# Supplementary material for: Cross-Species Transmission Potential of H4 Avian Influenza Viruses in China: Epidemiological and Evolutionary Study
Source: MDPI journal article supplement (doi:10.3390/v16030353), 2024-02-24
Supplement: s1 [file s1]

**Table S5.** Genotypes of H4N2, H4N3, H4N6 and H4N8 from wild birds, poultry and unknown

| H4N2     |            |         |         |
|----------|------------|---------|---------|
| Genotype | wild birds | poultry | unknown |
| G1       | 1          |         |         |
| G2       |            | 2       |         |
| G3       |            | 4       |         |
| G4       | 1          | 3       |         |
| G5       |            | 1       |         |
| G6       |            | 1       |         |
| G7       |            | 3       |         |
| G8       |            | 1       |         |
| G9       |            | 1       |         |
| G10      |            | 2       |         |
| G11      |            | 1       |         |
| G12      |            | 1       |         |
| G13      |            | 1       |         |
| G14      |            | 1       |         |
| G15      |            | 1       |         |
| G16      |            | 2       |         |
| G17      |            | 2       |         |
| G18      |            | 4       |         |
| G19      |            | 2       |         |
| G20      |            | 3       |         |
| G21      |            | 2       |         |
| G22      |            | 3       |         |
| G23      |            | 1       |         |
| G24      |            | 1       |         |

| H4N6     |            |         |         |
|----------|------------|---------|---------|
| Genotype | wild birds | poultry | unknown |
| G1       | 1          |         |         |
| G2       | 1          | 1       |         |
| G3       | 1          |         |         |
| G4       |            | 1       |         |
| G5       |            | 3       |         |
| G6       |            | 1       |         |
| G7       | 3          | 10      |         |
| G8       | 1          | 12      |         |
| G9       |            | 3       |         |
| G10      |            | 3       |         |
| G11      | 1          | 5       |         |
| G12      |            | 3       |         |
| G13      |            | 1       |         |
| G14      |            | 2       |         |
| G15      |            | 1       |         |
| G16      |            | 1       |         |
| G17      |            | 1       |         |
| G18      | 1          |         |         |
| G19      |            | 1       |         |
| G20      |            | 1       |         |
| G21      |            | 1       |         |
| G22      |            | 1       |         |
| G23      | 1          | 2       |         |
| G24      |            | 1       |         |

| H4N3     |            |         |         |
|----------|------------|---------|---------|
| Genotype | wild birds | poultry | unknown |
| G1       |            | 1       |         |
| G2       |            | 1       |         |
| G3       |            | 1       |         |
| G4       |            | 2       |         |

| H4N8     |            |         |         |
|----------|------------|---------|---------|
| Genotype | wild birds | poultry | unknown |
| G1       |            | 1       |         |
| G2       |            | 2       |         |
| G3       | 1          | 1       |         |
| G4       |            | 1       |         |
| G5       | 1          |         |         |
| G6       | 1          |         |         |
| G7       |            | 1       |         |
| G8       |            |         | 1       |
| G9       |            | 1       |         |
| G10      |            | 1       |         |
