# Supplementary material for: Cross-Species Transmission Potential of H4 Avian Influenza Viruses in China: Epidemiological and Evolutionary Study
Source: MDPI journal article supplement (doi:10.3390/v16030353), 2024-02-24
Supplement: s1 [file s1]

## 115

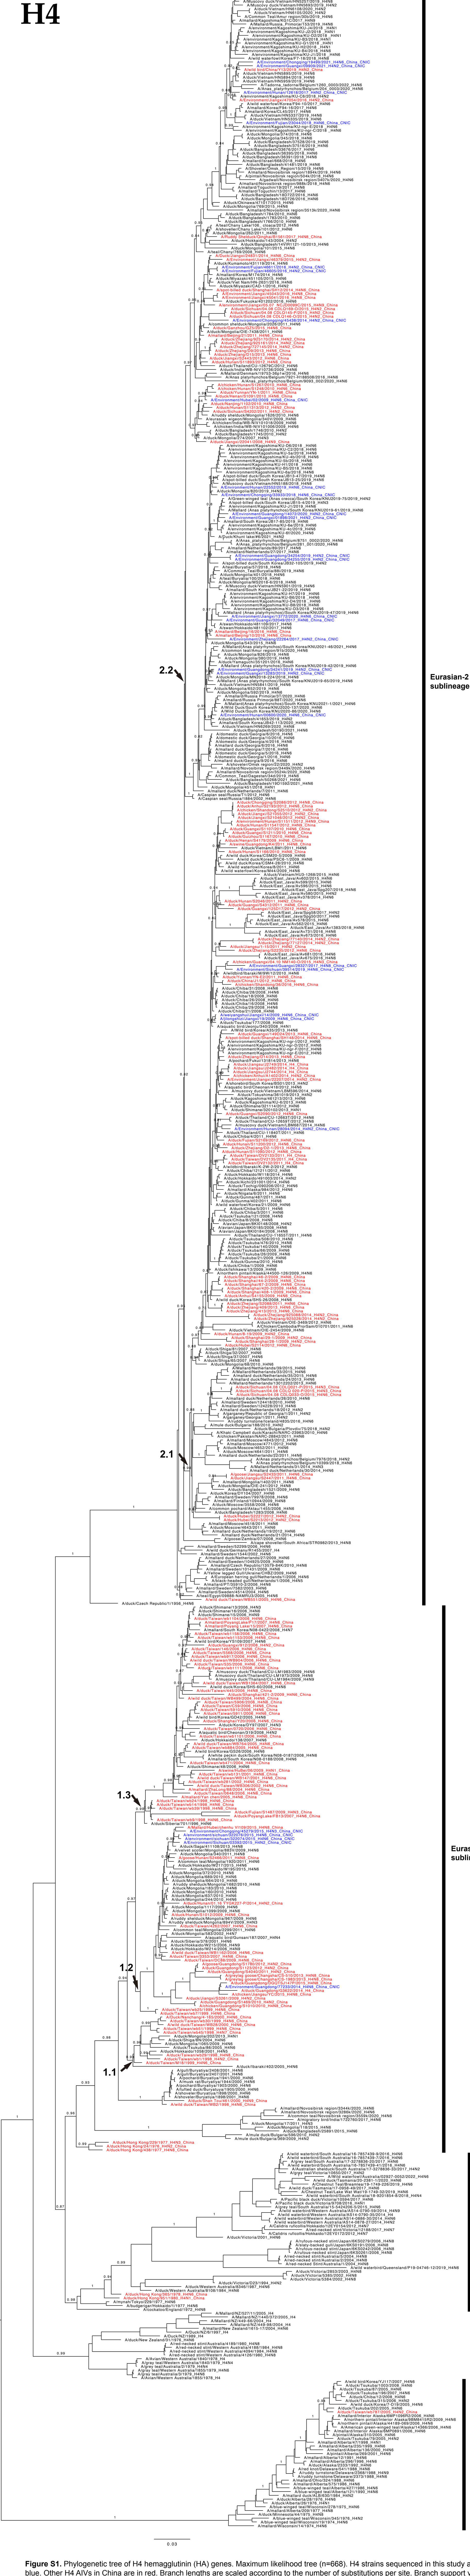

selected nodes are shown. Sublineages and subgroups are labeled with vertical lines on the right.
