# Supplementary material for: Cross-Species Transmission Potential of H4 Avian Influenza Viruses in China: Epidemiological and Evolutionary Study
Source: MDPI journal article supplement (doi:10.3390/v16030353), 2024-02-24
Supplement: s1 [file s1]

**Table S2.** Genotypes of all H4 subtype AIVs with the whole genome\*.

| Subtype     | Isolate name                       | Host                        | Genotype | HA                    | NA                        | PB2  | PB1  | PA   | NP   | M    | NS    |
|-------------|------------------------------------|-----------------------------|----------|-----------------------|---------------------------|------|------|------|------|------|-------|
| <b>H4N2</b> | A/duck/Hong Kong/24/1976           | wild birds                  | G1       | Eurasian-1 sublineage | N2-North American lineage | EA   | EA   | EA   | EA   | EA   | EA(A) |
|             | A/duck/Guangxi/912/2008            | poultry                     | G2       | Eurasian-1 sublineage | N2-Eurasian-1 sublineage  | EA   | EA   | EA   | EA   | EA   | EA(A) |
|             | A/Environment/Sichuan/03392/2015   | poultry-related environment | G2       | Eurasian-1 sublineage | N2-Eurasian-1 sublineage  | EA   | EA   | EA   | EA   | EA   | EA(A) |
|             | A/duck/Jiangxi/S3261/2009          | poultry                     | G3       | Eurasian-1 sublineage | N2-Eurasian-2 sublineage  | EA   | EA   | EA   | EA   | EA   | EA(A) |
|             | A/duck/Guangdong/S1469/2010        | poultry                     | G3       | Eurasian-1 sublineage | N2-Eurasian-2 sublineage  | EA   | EA   | EA   | EA   | EA   | EA(A) |
|             | A/duck/Guangdong/S1123/2012        | poultry                     | G3       | Eurasian-1 sublineage | N2-Eurasian-2 sublineage  | EA   | EA   | EA   | EA   | EA   | EA(A) |
|             | A/goose/Guangdong/S1780/2012       | poultry                     | G3       | Eurasian-1 sublineage | N2-Eurasian-2 sublineage  | EA   | EA   | EA   | EA   | EA   | EA(A) |
|             | A/duck/Hunan/8-19/2009             | poultry                     | G4       | Eurasian-2 sublineage | N2-Eurasian-1 sublineage  | EA   | EA   | EA   | EA   | EA   | EA(A) |
|             | A/duck/Hunan/S11313/2012           | poultry                     | G4       | Eurasian-2 sublineage | N2-Eurasian-1 sublineage  | EA   | EA   | EA   | EA   | EA   | EA(A) |
|             | A/chicken/Shandong/S2510/2012      | poultry                     | G4       | Eurasian-2 sublineage | N2-Eurasian-1 sublineage  | EA   | EA   | EA   | EA   | EA   | EA(A) |
|             | A/wild bird/China/Y13/2019         | wild birds                  | G4       | Eurasian-2 sublineage | N2-Eurasian-1 sublineage  | EA   | EA   | EA   | EA   | EA   | EA(A) |
|             | A/duck/Shanghai/29-1/2009          | poultry                     | G5       | Eurasian-2 sublineage | N2-Eurasian-1 sublineage  | ZJ-5 | EA   | ZJ-5 | ZJ-5 | EA   | EA(A) |
|             | A/duck/Guangdong/S4040/2011        | poultry                     | G6       | Eurasian-1 sublineage | N2-Eurasian-2 sublineage  | EA   | EA   | EA   | ZJ-5 | ZJ-5 | EA(A) |
|             | A/duck/Hunan/S2046/2011            | poultry                     | G7       | Eurasian-2 sublineage | N2-Eurasian-2 sublineage  | EA   | EA   | ZJ-5 | EA   | EA   | EA(A) |
|             | A/Environment/Fujian/46611/2016    | poultry-related environment | G7       | Eurasian-2 sublineage | N2-Eurasian-2 sublineage  | EA   | EA   | ZJ-5 | EA   | EA   | EA(A) |
|             | A/Environment/Fujian/46605/2016    | poultry-related environment | G7       | Eurasian-2 sublineage | N2-Eurasian-2 sublineage  | EA   | EA   | ZJ-5 | EA   | EA   | EA(A) |
|             | A/duck/Sichuan/S4202/2011          | poultry                     | G8       | Eurasian-2 sublineage | N2-Eurasian-1 sublineage  | EA   | EA   | EA   | EA   | EA   | EA(B) |
|             | A/duck/Jiangsu/1-15/2011           | poultry                     | G9       | Eurasian-2 sublineage | N2-Eurasian-1 sublineage  | H5Nx | H5Nx | H5Nx | H5Nx | H5Nx | H5Nx  |
|             | A/duck/Hubei/S2213/2012            | poultry                     | G10      | Eurasian-2 sublineage | N2-Eurasian-2 sublineage  | EA   | EA   | EA   | EA   | EA   | EA(A) |
|             | A/Environment/Chongqing/45438/2014 | poultry-related environment | G10      | Eurasian-2 sublineage | N2-Eurasian-2 sublineage  | EA   | EA   | EA   | EA   | EA   | EA(A) |
|             | A/duck/Jiangxi/S21055/2012         | poultry                     | G11      | Eurasian-2 sublineage | N2-Eurasian-2 sublineage  | EA   | EA   | ZJ-5 | ZJ-5 | EA   | ZJ-5  |
|             | A/duck/Jiangxi/S21046/2012         | poultry                     | G12      | Eurasian-2 sublineage | N2-Eurasian-2 sublineage  | ZJ-5 | EA   | ZJ-5 | ZJ-5 | ZJ-5 | EA(A) |

|             |                                     |                             |     |                       |                          |      |      |      |      |      |       |
|-------------|-------------------------------------|-----------------------------|-----|-----------------------|--------------------------|------|------|------|------|------|-------|
|             | A/duck/Guangxi/125D17/2012          | poultry                     | G13 | Eurasian-2 sublineage | N2-Eurasian-1 sublineage | ZJ-5 | EA   | EA   | EA   | ZJ-5 | EA(B) |
|             | A/duck/Hubei/S2227/2012             | poultry                     | G14 | Eurasian-2 sublineage | poultry H9N2 sublineage  | H9N2 | H9N2 | H9N2 | H9N2 | EA   | H9N2  |
|             | A/duck/Hunan/01.16 YYGK227-P/2014   | poultry                     | G15 | Eurasian-1 sublineage | N2-Eurasian-1 sublineage | EA   | EA   | EA   | EA   | EA   | EA(B) |
|             | A/Environment/Hunan/28094/2014      | poultry-related environment | G16 | Eurasian-2 sublineage | N2-Eurasian-2 sublineage | EA   | EA   | ZJ-5 | ZJ-5 | EA   | EA(A) |
|             | A/Environment/Hunan/12618/2017      | poultry-related environment | G16 | Eurasian-2 sublineage | N2-Eurasian-2 sublineage | EA   | EA   | ZJ-5 | ZJ-5 | EA   | EA(A) |
|             | A/duck/Zhejiang/925161/2014         | poultry                     | G17 | Eurasian-2 sublineage | N2-Eurasian-2 sublineage | EA   | ZJ-5 | ZJ-5 | EA   | ZJ-5 | ZJ-5  |
|             | A/duck/Zhejiang/925170/2014         | poultry                     | G17 | Eurasian-2 sublineage | N2-Eurasian-2 sublineage | EA   | ZJ-5 | ZJ-5 | EA   | ZJ-5 | ZJ-5  |
|             | A/duck/Zhejiang/77127/2014          | poultry                     | G18 | Eurasian-2 sublineage | N2-Eurasian-2 sublineage | ZJ-5 | ZJ-5 | ZJ-5 | EA   | ZJ-5 | EA(A) |
|             | A/duck/Zhejiang/77140/2014          | poultry                     | G18 | Eurasian-2 sublineage | N2-Eurasian-2 sublineage | ZJ-5 | ZJ-5 | ZJ-5 | EA   | ZJ-5 | EA(A) |
|             | A/duck/Zhejiang/727145/2014         | poultry                     | G18 | Eurasian-2 sublineage | N2-Eurasian-2 sublineage | ZJ-5 | ZJ-5 | ZJ-5 | EA   | ZJ-5 | EA(A) |
|             | A/Environment/Zhejiang/22264/2017   | poultry-related environment | G18 | Eurasian-2 sublineage | N2-Eurasian-2 sublineage | ZJ-5 | ZJ-5 | ZJ-5 | EA   | ZJ-5 | EA(A) |
|             | A/duck/Zhejiang/925028/2014         | poultry                     | G19 | Eurasian-2 sublineage | N2-Eurasian-2 sublineage | ZJ-5 | ZJ-5 | ZJ-5 | ZJ-5 | ZJ-5 | EA(A) |
|             | A/duck/Zhejiang/925088/2014         | poultry                     | G19 | Eurasian-2 sublineage | N2-Eurasian-2 sublineage | ZJ-5 | ZJ-5 | ZJ-5 | ZJ-5 | ZJ-5 | EA(A) |
|             | A/duck/Sichuan/04.08 CDLQ146-O/2015 | poultry                     | G20 | Eurasian-2 sublineage | N2-Eurasian-2 sublineage | EA   | EA   | EA   | EA   | ZJ-5 | EA(A) |
|             | A/Environment/Guangdong/34241/2019  | poultry-related environment | G20 | Eurasian-2 sublineage | N2-Eurasian-2 sublineage | EA   | EA   | EA   | EA   | ZJ-5 | EA(A) |
|             | A/Environment/Guangdong/34254/2019  | poultry-related environment | G20 | Eurasian-2 sublineage | N2-Eurasian-2 sublineage | EA   | EA   | EA   | EA   | ZJ-5 | EA(A) |
|             | A/duck/Sichuan/04.08 CDLQ169-O/2015 | poultry                     | G21 | Eurasian-2 sublineage | N2-Eurasian-2 sublineage | EA   | EA   | EA   | EA   | ZJ-5 | ZJ-5  |
|             | A/duck/Sichuan/04.08 CDLQ145-P/2015 | poultry                     | G21 | Eurasian-2 sublineage | N2-Eurasian-2 sublineage | EA   | EA   | EA   | EA   | ZJ-5 | ZJ-5  |
|             | A/Environment/Guangxi/13283/2019    | poultry-related environment | G22 | Eurasian-2 sublineage | N2-Eurasian-2 sublineage | EA   | EA   | EA   | EA   | ZJ-5 | EA(B) |
|             | A/Environment/Guangxi/01898/2021    | poultry-related environment | G22 | Eurasian-2 sublineage | N2-Eurasian-2 sublineage | EA   | EA   | EA   | EA   | ZJ-5 | EA(B) |
|             | A/Environment/Guangxi/09909/2021    | poultry-related environment | G22 | Eurasian-2 sublineage | N2-Eurasian-2 sublineage | EA   | EA   | EA   | EA   | ZJ-5 | EA(B) |
|             | A/Environment/Guangdong/34255/2019  | poultry-related environment | G23 | Eurasian-2 sublineage | N2-Eurasian-2 sublineage | EA   | EA   | ZJ-5 | EA   | ZJ-5 | EA(A) |
|             | A/Environment/Guangdong/14072/2020  | poultry-related environment | G24 | Eurasian-2 sublineage | N2-Eurasian-2 sublineage | EA   | EA   | EA   | ZJ-5 | EA   | EA(A) |
| <b>H4N3</b> | A/duck/Fujian/S1487/2009            | poultry                     | G1  | Eurasian-1 sublineage | N3-Eurasian lineage      | EA   | EA   | ZJ-5 | EA   | EA   | EA(A) |

|             |                                      |                             |    |                               |                          |    |      |      |    |      |       |
|-------------|--------------------------------------|-----------------------------|----|-------------------------------|--------------------------|----|------|------|----|------|-------|
|             | A/Environment/Chongqing/45279/2015   | poultry-related environment | G2 | Eurasian-1 sublineage         | N3-Eurasian lineage      | EA | EA   | EA   | EA | NA   | EA(B) |
|             | A/chicken/Guangxi/04.10 NM140-O/2015 | poultry                     | G3 | Eurasian-2 sublineage         | N3-Eurasian lineage      | EA | EA   | ZJ-5 | EA | EA   | EA(A) |
|             | A/duck/Sichuan/04.08 CDLQ 020-P/2015 | poultry                     | G4 | Eurasian-2 sublineage         | N3-Eurasian lineage      | EA | EA   | EA   | EA | ZJ-5 | EA(A) |
|             | A/duck/Sichuan/04.08 CDLQ021-P/2015  | poultry                     | G4 | Eurasian-2 sublineage         | N3-Eurasian lineage      | EA | EA   | EA   | EA | ZJ-5 | EA(A) |
| <b>H4N6</b> | A/duck/Hong Kong/365/1978            | wild birds                  | G1 | Oceania—East Asian sublineage | N6-Eurasian lineage      | EA | EA   | EA   | EA | EA   | EA(A) |
|             | A/Duck/Nanchang/4-165/2000           | poultry                     | G2 | Eurasian-1 sublineage         | N6-Eurasian lineage      | EA | EA   | EA   | EA | EA   | EA(A) |
|             | A/maillard/Yan chen/2005             | wild birds                  | G2 | Eurasian-1 sublineage         | N6-Eurasian lineage      | EA | EA   | EA   | EA | EA   | EA(A) |
|             | A/maillard/ZhaLong/88/2004           | wild birds                  | G3 | Eurasian-1 sublineage         | N6-Eurasian-2 sublineage | EA | EA   | EA   | EA | EA   | EA(A) |
|             | A/duck/Shanghai/Y20/2006             | poultry-related environment | G4 | Eurasian-1 sublineage         | N6-Eurasian lineage      | EA | ZJ-5 | EA   | EA | EA   | EA(A) |
|             | A/duck/Hunan/S1012/2009              | poultry                     | G5 | Eurasian-1 sublineage         | N6-Eurasian-1 sublineage | EA | EA   | EA   | EA | EA   | EA(A) |
|             | A/environment/sichuan/322076/2015    | poultry-related environment | G5 | Eurasian-1 sublineage         | N6-Eurasian-1 sublineage | EA | EA   | EA   | EA | EA   | EA(A) |
|             | A/environment/sichuan/322074/2015    | poultry-related environment | G5 | Eurasian-1 sublineage         | N6-Eurasian-1 sublineage | EA | EA   | EA   | EA | EA   | EA(A) |
|             | A/duck/Shanghai/421-2/2009           | poultry                     | G6 | Eurasian-1 sublineage         | N6-Eurasian-2 sublineage | EA | EA   | EA   | EA | EA   | EA(B) |
|             | A/Environment/Hubei/02/2009          | poultry-related environment | G7 | Eurasian-2 sublineage         | N6-Eurasian-1 sublineage | EA | EA   | EA   | EA | EA   | EA(A) |
|             | A/chicken/Hunan/S1248/2010           | poultry                     | G7 | Eurasian-2 sublineage         | N6-Eurasian-1 sublineage | EA | EA   | EA   | EA | EA   | EA(A) |
|             | A/chicken/Hunan/S1267/2010           | poultry                     | G7 | Eurasian-2 sublineage         | N6-Eurasian-1 sublineage | EA | EA   | EA   | EA | EA   | EA(A) |
|             | A/duck/Henan/S1091/2010              | poultry                     | G7 | Eurasian-2 sublineage         | N6-Eurasian-1 sublineage | EA | EA   | EA   | EA | EA   | EA(A) |
|             | A/duck/Yunnan/YN-1/2011              | wild birds                  | G7 | Eurasian-2 sublineage         | N6-Eurasian-1 sublineage | EA | EA   | EA   | EA | EA   | EA(A) |
|             | A/duck/Hunan/S11893/2012             | poultry                     | G7 | Eurasian-2 sublineage         | N6-Eurasian-1 sublineage | EA | EA   | EA   | EA | EA   | EA(A) |
|             | A/duck/Jiangxi/S2443/2012            | poultry                     | G7 | Eurasian-2 sublineage         | N6-Eurasian-1 sublineage | EA | EA   | EA   | EA | EA   | EA(A) |
|             | A/maillard/Beijing/10/2016           | wild birds                  | G7 | Eurasian-2 sublineage         | N6-Eurasian-1 sublineage | EA | EA   | EA   | EA | EA   | EA(A) |
|             | A/maillard/Beijing/16/2016           | wild birds                  | G7 | Eurasian-2 sublineage         | N6-Eurasian-1 sublineage | EA | EA   | EA   | EA | EA   | EA(A) |
|             | A/Environment/Guangxi/32049/2017     | poultry-related environment | G7 | Eurasian-2 sublineage         | N6-Eurasian-1 sublineage | EA | EA   | EA   | EA | EA   | EA(A) |
|             | A/Environment/Fujian/23044/2018      | poultry-related environment | G7 | Eurasian-2 sublineage         | N6-Eurasian-1 sublineage | EA | EA   | EA   | EA | EA   | EA(A) |

|                                       |                             |     |                       |                          |      |      |      |      |      |       |
|---------------------------------------|-----------------------------|-----|-----------------------|--------------------------|------|------|------|------|------|-------|
| A/Environment/Jiangxi/13772/2020      | poultry-related environment | G7  | Eurasian-2 sublineage | N6-Eurasian-1 sublineage | EA   | EA   | EA   | EA   | EA   | EA(A) |
| A/Environment/Hunan/00600/2020        | poultry-related environment | G7  | Eurasian-2 sublineage | N6-Eurasian-1 sublineage | EA   | EA   | EA   | EA   | EA   | EA(A) |
| A/weiyangshui/Jiangxi/14/2009         | poultry-related environment | G8  | Eurasian-2 sublineage | N6-Eurasian-2 sublineage | EA   | EA   | EA   | EA   | EA   | EA(A) |
| A/jilongshizi/Jiangxi/19/2009         | poultry-related environment | G8  | Eurasian-2 sublineage | N6-Eurasian-2 sublineage | EA   | EA   | EA   | EA   | EA   | EA(A) |
| A/duck/Anhui/S4155/2009               | poultry                     | G8  | Eurasian-2 sublineage | N6-Eurasian-2 sublineage | EA   | EA   | EA   | EA   | EA   | EA(A) |
| A/duck/Henan/S4179/2009               | poultry                     | G8  | Eurasian-2 sublineage | N6-Eurasian-2 sublineage | EA   | EA   | EA   | EA   | EA   | EA(A) |
| A/duck/Jiangsu/S2447/2011             | poultry                     | G8  | Eurasian-2 sublineage | N6-Eurasian-2 sublineage | EA   | EA   | EA   | EA   | EA   | EA(A) |
| A/goose/Jiangsu/S2433/2011            | poultry                     | G8  | Eurasian-2 sublineage | N6-Eurasian-2 sublineage | EA   | EA   | EA   | EA   | EA   | EA(A) |
| A/duck/Hunan/S11090/2012              | poultry                     | G8  | Eurasian-2 sublineage | N6-Eurasian-2 sublineage | EA   | EA   | EA   | EA   | EA   | EA(A) |
| A/duck/Hunan/S11200/2012              | poultry                     | G8  | Eurasian-2 sublineage | N6-Eurasian-2 sublineage | EA   | EA   | EA   | EA   | EA   | EA(A) |
| A/duck/Anhui/S2193/2012               | poultry                     | G8  | Eurasian-2 sublineage | N6-Eurasian-2 sublineage | EA   | EA   | EA   | EA   | EA   | EA(A) |
| A/duck/Guangxi/S2090/2012             | poultry                     | G8  | Eurasian-2 sublineage | N6-Eurasian-2 sublineage | EA   | EA   | EA   | EA   | EA   | EA(A) |
| A/duck/Guangxi/149D24/2013            | poultry                     | G8  | Eurasian-2 sublineage | N6-Eurasian-2 sublineage | EA   | EA   | EA   | EA   | EA   | EA(A) |
| A/spot-billed duck/Shanghai/SH12/2014 | wild birds                  | G8  | Eurasian-2 sublineage | N6-Eurasian-2 sublineage | EA   | EA   | EA   | EA   | EA   | EA(A) |
| A/chicken/Shandong/36/2016            | poultry                     | G8  | Eurasian-2 sublineage | N6-Eurasian-2 sublineage | EA   | EA   | EA   | EA   | EA   | EA(A) |
| A/duck/Shanghai/44-2/2009             | poultry                     | G9  | Eurasian-2 sublineage | N6-Eurasian-2 sublineage | ZJ-5 | EA   | ZJ-5 | ZJ-5 | EA   | EA(A) |
| A/duck/Shanghai/46-2/2009             | poultry                     | G9  | Eurasian-2 sublineage | N6-Eurasian-2 sublineage | ZJ-5 | EA   | ZJ-5 | ZJ-5 | EA   | EA(A) |
| A/duck/Shanghai/67-2/2009             | poultry                     | G9  | Eurasian-2 sublineage | N6-Eurasian-2 sublineage | ZJ-5 | EA   | ZJ-5 | ZJ-5 | EA   | EA(A) |
| A/duck/Shanghai/408-1/2009            | poultry                     | G10 | Eurasian-2 sublineage | N6-Eurasian-2 sublineage | ZJ-5 | ZJ-5 | EA   | ZJ-5 | ZJ-5 | EA(A) |
| A/duck/Shanghai/420-2/2009            | poultry                     | G10 | Eurasian-2 sublineage | N6-Eurasian-2 sublineage | ZJ-5 | ZJ-5 | EA   | ZJ-5 | ZJ-5 | EA(A) |
| A/duck/Zhejiang/D15/2013              | poultry                     | G10 | Eurasian-2 sublineage | N6-Eurasian-2 sublineage | ZJ-5 | ZJ-5 | EA   | ZJ-5 | ZJ-5 | EA(A) |
| A/duck/Guangxi/S1107/2010             | poultry                     | G11 | Eurasian-2 sublineage | N6-Eurasian-2 sublineage | EA   | EA   | EA   | EA   | EA   | EA(B) |
| A/duck/Guangxi/S1211/2010             | poultry                     | G11 | Eurasian-2 sublineage | N6-Eurasian-2 sublineage | EA   | EA   | EA   | EA   | EA   | EA(B) |
| A/duck/Guizhou/S1167/2010             | poultry                     | G11 | Eurasian-2 sublineage | N6-Eurasian-2 sublineage | EA   | EA   | EA   | EA   | EA   | EA(B) |

|             |                                        |                             |     |                       |                           |      |      |      |      |      |       |
|-------------|----------------------------------------|-----------------------------|-----|-----------------------|---------------------------|------|------|------|------|------|-------|
|             | A/duck/Hunan/S1166/2010                | poultry                     | G11 | Eurasian-2 sublineage | N6-Eurasian-2 sublineage  | EA   | EA   | EA   | EA   | EA   | EA(B) |
|             | A/duck/Yunnan/YN-E2/2011               | wild birds                  | G11 | Eurasian-2 sublineage | N6-Eurasian-2 sublineage  | EA   | EA   | EA   | EA   | EA   | EA(B) |
|             | A/duck/Guangxi/S4312/2011              | poultry                     | G11 | Eurasian-2 sublineage | N6-Eurasian-2 sublineage  | EA   | EA   | EA   | EA   | EA   | EA(B) |
|             | A/duck/Zhejiang/S2088/2011             | poultry                     | G12 | Eurasian-2 sublineage | N6-Eurasian-2 sublineage  | ZJ-5 | EA   | ZJ-5 | ZJ-5 | ZJ-5 | EA(A) |
|             | A/duck/Zhejiang/409/2013               | poultry                     | G12 | Eurasian-2 sublineage | N6-Eurasian-2 sublineage  | ZJ-5 | EA   | ZJ-5 | ZJ-5 | ZJ-5 | EA(A) |
|             | A/duck/Zhejiang/413/2013               | poultry                     | G12 | Eurasian-2 sublineage | N6-Eurasian-2 sublineage  | ZJ-5 | EA   | ZJ-5 | ZJ-5 | ZJ-5 | EA(A) |
|             | A/mallard/Beijing/21/2011              | wild birds                  | G13 | Eurasian-2 sublineage | N6-Eurasian-1 sublineage  | EA   | EA   | EA   | EA   | EA   | EA(B) |
|             | A/Environment/Hunan/22552/2019         | poultry-related environment | G13 | Eurasian-2 sublineage | N6-Eurasian-1 sublineage  | EA   | EA   | EA   | EA   | EA   | EA(B) |
|             | A/Environment/Chongqing/19499/2021     | poultry-related environment | G13 | Eurasian-2 sublineage | N6-Eurasian-1 sublineage  | EA   | EA   | EA   | EA   | EA   | EA(B) |
|             | A/duck/China/J1/2012                   | poultry                     | G14 | Eurasian-2 sublineage | N6-Eurasian-2 sublineage  | EA   | NA   | EA   | EA   | EA   | EA(A) |
|             | A/duck/Fujian/S2169/2012               | poultry                     | G15 | Eurasian-2 sublineage | N6-Eurasian-2 sublineage  | ZJ-5 | ZJ-5 | ZJ-5 | ZJ-5 | ZJ-5 | EA(A) |
|             | A/duck/Zhejiang/D2-1/2013              | poultry                     | G15 | Eurasian-2 sublineage | N6-Eurasian-2 sublineage  | ZJ-5 | ZJ-5 | ZJ-5 | ZJ-5 | ZJ-5 | EA(A) |
|             | A/duck/Zhejiang/S2235/2012             | poultry                     | G16 | Eurasian-2 sublineage | N6-Eurasian-1 sublineage  | ZJ-5 | ZJ-5 | ZJ-5 | ZJ-5 | ZJ-5 | EA(A) |
|             | A/duck/Zhejiang/D9/2013                | poultry                     | G17 | Eurasian-2 sublineage | N6-Eurasian-2 sublineage  | ZJ-5 | ZJ-5 | EA   | EA   | ZJ-5 | EA(A) |
|             | A/duck/Zhejiang/D14/2013               | poultry                     | G18 | Eurasian-2 sublineage | N6-Eurasian-2 sublineage  | ZJ-5 | EA   | EA   | ZJ-5 | ZJ-5 | EA(A) |
|             | A/spot-billed duck/Shanghai/SH148/2014 | wild birds                  | G19 | Eurasian-2 sublineage | N6-Eurasian-2 sublineage  | EA   | EA   | EA   | EA   | ZJ-5 | EA(A) |
|             | A/Duck/Jiangxi/24831/2014              | poultry                     | G20 | Eurasian-2 sublineage | N6-Eurasian-2 sublineage  | EA   | ZJ-5 | ZJ-5 | EA   | ZJ-5 | EA(A) |
|             | A/duck/Sichuan/04.08 CDLQ033-O/2015    | poultry                     | G21 | Eurasian-2 sublineage | N6-Eurasian-1 sublineage  | EA   | EA   | EA   | EA   | NA   | EA(A) |
|             | A/duck/Ganzhou/GZ5/2015                | poultry                     | G22 | Eurasian-2 sublineage | N6-Eurasian-1 sublineage  | EA   | EA   | ZJ-5 | EA   | EA   | H5Nx  |
|             | A/Environment/Chongqing/33933/2018     | poultry-related environment | G23 | Eurasian-2 sublineage | N6-Eurasian-1 sublineage  | EA   | EA   | ZJ-5 | EA   | EA   | EA(B) |
|             | A/Environment/Sichuan/39514/2019       | poultry-related environment | G24 | Eurasian-2 sublineage | N6-Eurasian-1 sublineage  | EA   | EA   | EA   | EA   | ZJ-5 | EA(A) |
| <b>H4N8</b> | A/chicken/Guangdong/S1010/2010         | poultry                     | G1  | Eurasian-1 sublineage | N8-North American lineage | EA   | EA   | EA   | EA   | EA   | EA(A) |
|             | A/duck/Nanjing/1102/2010               | poultry                     | G2  | Eurasian-2 sublineage | N8-North American lineage | EA   | EA   | EA   | EA   | EA   | EA(A) |
|             | A/duck/Hubei/S2114/2012                | poultry                     | G2  | Eurasian-2 sublineage | N8-North American lineage | EA   | EA   | EA   | EA   | EA   | EA(A) |

|                                       |                             |     |                       |                           |      |      |      |      |      |       |
|---------------------------------------|-----------------------------|-----|-----------------------|---------------------------|------|------|------|------|------|-------|
| A/goose/Hunan/S2466/2011              | poultry                     | G3  | Eurasian-1 sublineage | N8-Eurasian lineage       | EA   | EA   | EA   | EA   | EA   | EA(A) |
| A/Mallard/Hubei/chenhu VI109/2015     | wild birds                  | G3  | Eurasian-1 sublineage | N8-Eurasian lineage       | EA   | EA   | EA   | EA   | EA   | EA(A) |
| A/duck/Chongqing/S2086/2012           | poultry                     | G4  | Eurasian-2 sublineage | N8-Eurasian lineage       | EA   | EA   | EA   | EA   | EA   | EA(A) |
| A/greylag goose/Changsha/CS-1983/2013 | wild birds                  | G5  | Eurasian-1 sublineage | N8-North American lineage | EA   | EA   | EA   | ZJ-5 | EA   | EA(A) |
| A/greylag goose/Changsha/CS-510/2013  | wild birds                  | G6  | Eurasian-1 sublineage | N8-North American lineage | H9N2 | EA   | EA   | ZJ-5 | EA   | EA(A) |
| A/Environment/Guangdong/77233/2014    | poultry-related environment | G7  | Eurasian-1 sublineage | N8-North American lineage | EA   | EA   | ZJ-5 | EA   | ZJ-5 | EA(B) |
| A/duck/Guangdong/DGQTSJ147P/2015      | unknown                     | G8  | Eurasian-1 sublineage | N8-North American lineage | EA   | EA   | EA   | EA   | ZJ-5 | EA(A) |
| A/chicken/Jiangsu/YC/2015             | poultry                     | G9  | Eurasian-1 sublineage | N8-North American lineage | EA   | ZJ-5 | EA   | EA   | ZJ-5 | EA(A) |
| A/Environment/Guangxi/28327/2017      | poultry-related environment | G10 | Eurasian-2 sublineage | N8-North American lineage | ZJ-5 | EA   | EA   | EA   | ZJ-5 | EA(A) |

\* Abbreviation of sublineages in internal genes: EA, Eurasian wild bird gene pool; EA(A), Eurasian wild bird gene pool (allele A); EA(B), Eurasian wild bird gene pool (allele B); NA, North American wild bird gene pool; ZJ-5, ZJ-5 sublineage (gene pool); H9N2, poultry H9N2(ZJ-HJ/07); H5Nx, H5Nx sublineage.
