# Supplementary material for: Cross-Species Transmission Potential of H4 Avian Influenza Viruses in China: Epidemiological and Evolutionary Study
Source: MDPI journal article supplement (doi:10.3390/v16030353), 2024-02-24
Supplement: s1 [file s1]

**Table S4.** Potential glycosylation motifs of HA protein.

| isolate name                                | 2 NYT | 18 NGT | 162 NLT | 294 NIS | 438 NDS | 481 NGT |
|---------------------------------------------|-------|--------|---------|---------|---------|---------|
| A/wild bird/China/Y13/2019_H4N2             | NYT   | NGT    | NLT     | NIS     |         | NGT     |
| A/Environment/Hunan/12618/2017_H4N2         | NYT   | NGT    | NLT     | NIS     |         | NGT     |
| A/Environment/Guangxi/09909/2021_H4N2       | NYT   | NGT    | NLT     | NIS     |         | NGT     |
| A/Environment/Chongqing/19499/2021_H4N6     | NYT   | NGT    | NLT     | NIS     |         | NGT     |
| A/Environment/Fujian/23044/2018_H4N6        | NYT   | NGT    | NLT     | NIS     |         | NGT     |
| A/weiyangshui/Jiangxi/14/2009_H4N6          | NYT   | NGT    | NLT     | NIS     |         | NGT     |
| A/jilongshizi/Jiangxi/19/2009_H4N6          | NYT   | NGT    | NLT     | NIS     |         | NGT     |
| A/duck/Yunnan/YN-E2/2011_H4N6               | NYT   | NGT    | NLT     | NIS     |         | NGT     |
| A/duck/Hunan/S2046/2011_H4N2                | NYT   | NGT    | NLT     | NIS     |         | NGT     |
| A/duck/Henan/S4179/2009_H4N6                | NYT   | NGT    | NLT     | NIS     |         | NGT     |
| A/duck/Guizhou/S1167/2010_H4N6              | NYT   | NGT    | NLT     | NIS     |         | NGT     |
| A/duck/Guangxi/S1107/2010_H4N6              | NYT   | NGT    | NLT     | NIS     |         | NGT     |
| A/duck/Guangxi/S1211/2010_H4N6              | NYT   | NGT    | NLT     | NIS     |         | NGT     |
| A/duck/Hunan/S1166/2010_H4N6                | NYT   | NGT    | NLT     | NIS     |         | NGT     |
| A/spot-billed duck/Shanghai/SH148/2014_H4N6 | NYT   | NGT    | NLT     | NIS     |         | NGT     |
| A/duck/Hunan/S11200/2012_H4N6               | NYT   | NGT    | NLT     | NIS     |         | NGT     |
| A/duck/Hunan/S11090/2012_H4N6               | NYT   | NGT    | NLT     | NIS     |         | NGT     |
| A/duck/Zhejiang/D14/2013_H4N6               | NYT   | NGT    | NLT     | NIS     |         | NGT     |
| A/duck/Guangxi/S2090/2012_H4N6              | NYT   | NGT    | NLT     | NIS     |         | NGT     |
| A/duck/Fujian/S2169/2012_H4N6               | NYT   | NGT    | NLT     | NIS     |         | NGT     |
| A/duck/Guangxi/S4312/2011_H4N6              | NYT   | NGT    | NLT     | NIS     |         | NGT     |
| A/duck/China/J1/2012_H4N6                   | NYT   | NGT    | NLT     | NIS     |         | NGT     |
| A/chicken/Shandong/36/2016_H4N6             | NYT   | NGT    | NLT     | NIS     |         | NGT     |
| A/duck/Zhejiang/D2-1/2013_H4N6              | NYT   | NGT    | NLT     | NIS     |         | NGT     |
| A/duck/Shanghai/67-2/2009_H4N6              | NYT   | NGT    | NLT     | NIS     |         | NGT     |
| A/duck/Shanghai/46-2/2009_H4N6              | NYT   | NGT    | NLT     | NIS     |         | NGT     |
| A/duck/Shanghai/44-2/2009_H4N6              | NYT   | NGT    | NLT     | NIS     |         | NGT     |
| A/duck/Shanghai/420-2/2009_H4N6             | NYT   | NGT    | NLT     | NIS     |         | NGT     |
| A/duck/Shanghai/408-1/2009_H4N6             | NYT   | NGT    | NLT     | NIS     |         | NGT     |
| A/duck/Anhui/S4155/2009_H4N6                | NYT   | NGT    | NLT     | NIS     |         | NGT     |
| A/duck/Jiangxi/S21055/2012_H4N2             | NYT   | NGT    | NLT     | NIS     |         | NGT     |
| A/duck/Jiangxi/S21046/2012_H4N2             | NYT   | NGT    | NLT     | NIS     |         | NGT     |
| A/duck/Chongqing/S2086/2012_H4N8            | NYT   | NGT    | NLT     | NIS     |         | NGT     |
| A/duck/Anhui/S2193/2012_H4N6                | NYT   | NGT    | NLT     | NIS     |         | NGT     |
| A/chicken/Shandong/S2510/2012_H4N2          | NYT   | NGT    | NLT     | NIS     |         | NGT     |
| A/duck/Zhejiang/S2088/2011_H4N6             | NYT   | NGT    | NLT     | NIS     |         | NGT     |
| A/duck/Zhejiang/413/2013_H4N6               | NYT   | NGT    | NLT     | NIS     |         | NGT     |
| A/duck/Zhejiang/409/2013_H4N6               | NYT   | NGT    | NLT     | NIS     |         | NGT     |
| A/duck/Hunan/8-19/2009_H4N2                 | NYT   | NGT    | NLT     | NIS     |         | NGT     |
| A/Environment/Sichuan/39514/2019_H4N6       | NYT   | NGT    | NLT     | NIS     |         | NGT     |
| A/chicken/Guangxi/04.10 NM140-O/2015_H4N3   | NYT   |        | NLT     | NIS     |         | NGT     |
| A/Environment/Guangxi/28327/2017_H4N8       | NYT   | NGT    | NLT     | NIS     |         | NGT     |
| A/duck/Jiangsu/1-15/2011_H4N2               | NYT   | NGT    | NLT     | NIS     |         | NGT     |

|                                            |               |     |     |     |     |
|--------------------------------------------|---------------|-----|-----|-----|-----|
| A/duck/Guangxi/149D24/2013_H4N6            | NYT           | NGT | NLT | NIS | NGT |
| A/Environment/Hunan/28094/2014_H4N2        | NYT           | NGT | NLT | NIS | NGT |
| A/duck/Zhejiang/S2235/2012_H4N6            | NYT           | NGT | NLT | NIS | NGT |
| A/duck/Guangxi/125D17/2012_H4N2            | NYT           | NGT | NLT | NIS | NGT |
| A/duck/Shanghai/29-1/2009_H4N2             | NYT           | NGT | NLT | NIS | NGT |
| A/spot-billed duck/Shanghai/SH12/2014_H4N6 | NYT           | NGT | NLT | NIS | NGT |
| A/mallard/Beijing/21/2011_H4N6             | NYT           | NGT | NLT | NIS | NGT |
| A/duck/Jiangxi/S2443/2012_H4N6             | NYT           | NGT | NLT | NIS | NGT |
| A/duck/Hunan/S11893/2012_H4N6              | NYT           | NGT | NLT | NIS | NGT |
| A/duck/Ganzhou/GZ5/2015_H4N6               | NYT           | NGT | NLT | NIS | NGT |
| A/Environment/Fujian/46611/2016_H4N2       | NYT           | NGT | NLT | NIS | NGT |
| A/Environment/Fujian/46605/2016_H4N2       | NYT           | NGT | NLT | NIS | NGT |
| A/Duck/Jiangxi/24831/2014_H4N6             | NYT           | NGT | NLT | NIS | NGT |
| A/duck/Zhejiang/D9/2013_H4N6               | NYT           | NGT | NLT | NIS | NGT |
| A/duck/Zhejiang/D15/2013_H4N6              | NYT           | NGT | NLT | NIS | NGT |
| A/duck/Zhejiang/925170/2014_H4N2           | NYT           | NGT | NLT | NIS | NGT |
| A/duck/Zhejiang/925161/2014_H4N2           | NYT           | NGT | NLT | NIS | NGT |
| A/duck/Zhejiang/727145/2014_H4N2           | NYT           | NGT | NLT | NIS | NGT |
| A/duck/Hubei/S2114/2012_H4N8               | NYT           | NGT | NLT | NIS | NGT |
| A/Environment/Hubei/02/2009_H4N6           | NYT           | NGT | NLT | NIS | NGT |
| A/duck/Henan/S1091/2010_H4N6               | NYT           | NGT | NLT | NIS | NGT |
| A/chicken/Hunan/S1267/2010_H4N6            | NYT           | NGT | NLT | NIS | NGT |
| A/chicken/Hunan/S1248/2010_H4N6            | NYT           | NGT | NLT | NIS | NGT |
| A/duck/Yunnan/YN-1/2011_H4N6               | NYT           | NGT | NLT | NIS | NGT |
| A/duck/Sichuan/S4202/2011_H4N2             | NYT           | NGT | NLT | NIS | NGT |
| A/duck/Nanjing/1102/2010_H4N8              | NYT           | NGT | NLT | NIS | NGT |
| A/duck/Hunan/S11313/2012_H4N2              | NYT           | NGT | NLT | NIS | NGT |
| A/duck/Sichuan/04.08 CDLQ169-O/2015_H4N2   | NYT           | NGT | NLT | NIS | NGT |
| A/duck/Sichuan/04.08 CDLQ145-P/2015_H4N2   | NYT           | NGT | NLT | NIS | NGT |
| A/duck/Sichuan/04.08 CDLQ146-O/2015_H4N2   | NYT           | NGT | NLT | NIS | NGT |
| A/Environment/Chongqing/45438/2014_H4N2    | NYT           | NGT | NLT | NIS | NGT |
| A/duck/Zhejiang/77140/2014_H4N2            |               | NGT | NLT | NIS | NGT |
| A/duck/Zhejiang/77127/2014_H4N2            |               | NGT | NLT | NIS | NGT |
| A/mallard/Beijing/16/2016_H4N6             | NYT           | NGT | NLT | NIS | NGT |
| A/mallard/Beijing/10/2016_H4N6             | NYT           | NGT | NLT | NIS | NGT |
| A/Environment/Hunan/22552/2019_H4N6        | NYT           | NGT | NLT | NIS | NGT |
| A/Environment/Chongqing/33933/2018_H4N6    | NYT           | NGT | NLT | NIS | NGT |
| A/Environment/Guangxi/13283/2019_H4N2      | not available | NGT | NLT | NIS | NGT |
| A/Environment/Guangdong/34241/2019_H4N2    | NYT           | NGT | NLT | NIS | NGT |
| A/Environment/Hunan/00600/2020_H4N6        | NYT           | NGT | NLT | NIS | NGT |
| A/Environment/Guangxi/01898/2021_H4N2      | NYT           | NGT | NLT | NIS | NGT |
| A/Environment/Guangdong/14072/2020_H4N2    | NYT           | NGT | NLT | NIS | NGT |
| A/Environment/Guangxi/32049/2017_H4N6      | NYT           | NGT | NLT | NIS | NGT |
| A/Environment/Zhejiang/22264/2017_H4N2     | NYT           | NGT | NLT | NIS | NGT |
| A/Environment/Jiangxi/13772/2020_H4N6      | NYT           | NGT | NLT | NIS | NGT |

|                                            |     |     |     |     |     |     |
|--------------------------------------------|-----|-----|-----|-----|-----|-----|
| A/Environment/Guangdong/34255/2019_H4N2    | NYT | NGT | NLT | NIS |     | NGT |
| A/Environment/Guangdong/34254/2019_H4N2    | NYT | NGT | NLT | NIS |     | NGT |
| A/duck/Hubei/S2227/2012_H4N2               | NYT | NGT | NLT | NIS |     | NGT |
| A/duck/Hubei/S2213/2012_H4N2               | NYT | NGT | NLT | NIS |     | NGT |
| A/duck/Zhejiang/925088/2014_H4N2           | NYT | NGT | NLT | NIS |     | NGT |
| A/duck/Zhejiang/925028/2014_H4N2           | NYT | NGT | NLT | NIS |     | NGT |
| A/duck/Sichuan/04.08 CDLQ033-O/2015_H4N6   | NYT | NGT | NLT | NIS |     | NGT |
| A/duck/Sichuan/04.08 CDLQ021-P/2015_H4N3   | NYT | NGT | NLT | NIS |     | NGT |
| A/duck/Sichuan/04.08 CDLQ 020-P/2015_H4N3  | NYT | NGT | NLT | NIS |     | NGT |
| A/goose/Jiangsu/S2433/2011_H4N6            | NYT | NGT | NLT | NIS |     | NGT |
| A/duck/Jiangsu/S2447/2011_H4N6             | NYT | NGT | NLT | NIS |     | NGT |
| A/mallard/ZhaLong/88/2004_H4N6             | NYT | NGT | NLT | NIS |     | NGT |
| A/duck/Shanghai/Y20/2006_H4N6              | NYT | NGT | NLT | NIS | NDS | NGT |
| A/duck/Guangxi/912/2008_H4N2               | NYT | NGT | NLT | NIS |     | NGT |
| A/mallard/Yan chen/2005_H4N6               | NYT | NGT | NLT | NIS |     | NGT |
| A/duck/Shanghai/421-2/2009_H4N6            | NYT | NGT | NLT | NIS |     | NGT |
| A/Mallard/Hubei/chenu V1109/2015_H4N8      | NYT | NGT | NLT | NIS |     | NGT |
| A/environment/sichuan/322076/2015_H4N6     | NYT | NGT | NLT | NIS |     | NGT |
| A/environment/sichuan/322074/2015_H4N6     | NYT | NGT | NLT | NIS |     | NGT |
| A/Environment/Sichuan/03392/2015_H4N2      | NYT | NGT | NLT | NIS |     | NGT |
| A/Environment/Chongqing/45279/2015_H4N3    | NYT | NGT | NLT | NIS |     | NGT |
| A/goose/Hunan/S2466/2011_H4N8              | NYT | NGT | NLT | NIS |     | NGT |
| A/duck/Hunan/S1012/2009_H4N6               | NYT | NGT | NLT | NIS |     | NGT |
| A/duck/Hunan/01.16 YYGK227-P/2014_H4N2     | NYT | NGT | NLT | NIS |     | NGT |
| A/greylag goose/Changsha/CS-510/2013_H4N8  | NYT | NGT | NLT | NIS |     | NGT |
| A/greylag goose/Changsha/CS-1983/2013_H4N8 | NYT | NGT | NLT | NIS |     | NGT |
| A/goose/Guangdong/S1780/2012_H4N2          | NYT | NGT | NLT | NIS |     | NGT |
| A/duck/Guangdong/S1123/2012_H4N2           | NYT | NGT | NLT | NIS |     | NGT |
| A/duck/Guangdong/S4040/2011_H4N2           | NYT | NGT | NLT | NIS |     | NGT |
| A/duck/Jiangxi/S3261/2009_H4N2             | NYT | NGT | NLT | NIS |     | NGT |
| A/duck/Guangdong/S1469/2010_H4N2           | NYT | NGT | NLT | NIS |     | NGT |
| A/chicken/Guangdong/S1010/2010_H4N8        | NYT | NGT | NLT | NIS |     | NGT |
| A/Environment/Guangdong/77233/2014_H4N8    | NYT | NGT | NLT | NIS |     | NGT |
| A/duck/Guangdong/DGQTSJ147P/2015_H4N8      | NYT | NGT | NLT | NIS |     | NGT |
| A/chicken/Jiangsu/YC/2015_H4N8             | NYT | NGT | NLT | NIS |     | NGT |
| A/Duck/Nanchang/4-165/2000_H4N6            | NYT | NGT | NLT | NIS |     | NGT |
| A/duck/Fujian/S1487/2009_H4N3              | NYT | NGT | NLT | NIS |     | NGT |
| A/duck/Hong Kong/365/1978_H4N6             | NYT | NGT | NLT | NIS |     | NGT |
| A/duck/Hong Kong/24/1976_H4N2              | NYT | NGT | NLT | NIS |     | NGT |

---
