# Supplementary material for: Cross-Species Transmission Potential of H4 Avian Influenza Viruses in China: Epidemiological and Evolutionary Study
Source: MDPI journal article supplement (doi:10.3390/v16030353), 2024-02-24
Supplement: s1 [file s1]

### (a)H4N8

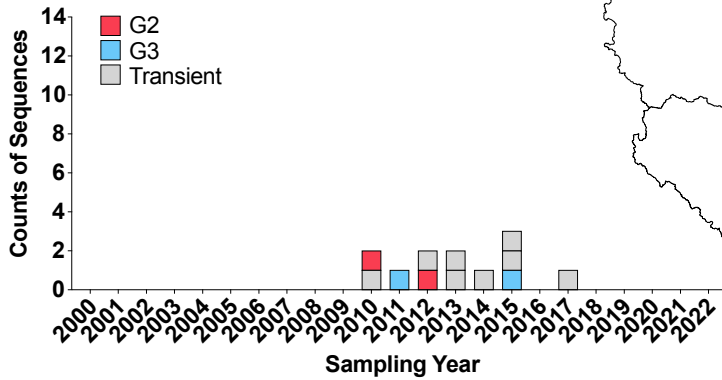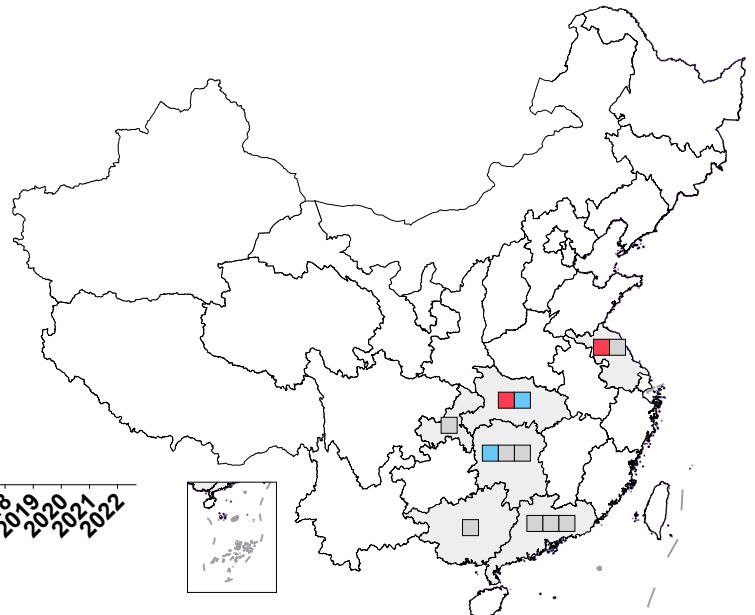

### (b)H4N3

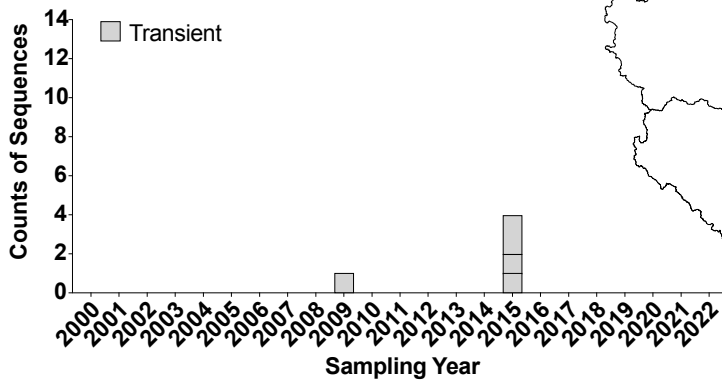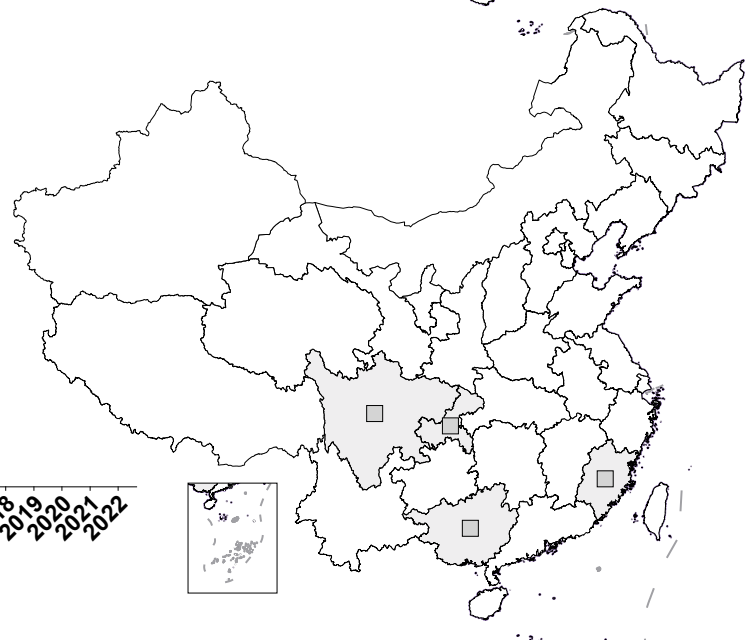

**Figure 4.** Diversity of genotypes of H4N8 and H4N3 AIVs in China during 2000-2022. (a) The distribution of genotypes of H4N8; (b) The distribution of genotypes of H4N3. The left panel shows the temporal distribution of the genotypes. The right panel shows the geographic distribution of the genotypes; provinces with detected genotypes are filled with grey color on the map; different genotypes are marked with square symbols of corresponding color on the map; transient genotypes are marked with grey square symbols.
