# Supplementary material for: Cross-Species Transmission Potential of H4 Avian Influenza Viruses in China: Epidemiological and Evolutionary Study
Source: MDPI journal article supplement (doi:10.3390/v16030353), 2024-02-24
Supplement: s1 [file s1]

**Table S1.** Detailed information of 31 environmental H4 subtype viruses obtained in our surveillance.

| Subtype | Isolate name                       | Province  | Collection date | Sampling site*               | Sampling type         |
|---------|------------------------------------|-----------|-----------------|------------------------------|-----------------------|
| H4N2    | A/Environment/Hunan/28094/2014     | Hunan     | 2014-04-21      | live poultry market          | others                |
|         | A/Environment/Chongqing/45438/2014 | Chongqing | 2014-12-17      | live poultry market          | others                |
|         | A/Environment/Sichuan/03392/2015   | Sichuan   | 2015-12-09      | live poultry market          | others                |
|         | A/Environment/Fujian/46605/2016    | Fujian    | 2016-02-22      | live poultry market          | others                |
|         | A/Environment/Fujian/46611/2016    | Fujian    | 2016-02-22      | live poultry market          | others                |
|         | A/Environment/Hunan/12618/2017     | Hunan     | 2017-02-08      | live poultry market          | others                |
|         | A/Environment/Zhejiang/22264/2017  | Zhejiang  | 2017-12-22      | poultry processing companies | others                |
|         | A/Environment/Guangxi/13283/2019   | Guangxi   | 2019-01-17      | live poultry market          | others                |
|         | A/Environment/Guangdong/34241/2019 | Guangdong | 2019-02-13      | live poultry market          | feces                 |
|         | A/Environment/Guangdong/34255/2019 | Guangdong | 2019-03-25      | live poultry market          | feces                 |
|         | A/Environment/Guangdong/34254/2019 | Guangdong | 2019-03-25      | live poultry market          | drinking water        |
|         | A/Environment/Guangdong/14072/2020 | Guangdong | 2020-10-19      | unknown                      | others                |
|         | A/Environment/Guangxi/01898/2021   | Guangxi   | 2021-01-24      | unknown                      | others                |
|         | A/Environment/Guangxi/09909/2021   | Guangxi   | 2021-08-12      | unknown                      | others                |
| H4N3    | A/Environment/Chongqing/45279/2015 | Chongqing | 2015-05-20      | live poultry market          | others                |
| H4N6    | A/jilongshizi/Jiangxi/19/2009      | Jiangxi   | 2009-02-26      | live poultry market          | surface swab of cages |
|         | A/weiyangshui/Jiangxi/14/2009      | Jiangxi   | 2009-02-26      | live poultry market          | drinking water        |
|         | A/Environment/Hubei/02/2009        | Hubei     | 2009-12-02      | unknown                      | feces                 |
|         | A/environment/sichuan/322074/2015  | Sichuan   | 2015-07-24      | poultry farm                 | sewage                |
|         | A/environment/sichuan/322076/2015  | Sichuan   | 2015-07-24      | poultry farm                 | sewage                |
|         | A/Environment/Guangxi/32049/2017   | Guangxi   | 2017-05-25      | live poultry market          | others                |
|         | A/Environment/Fujian/23044/2018    | Fujian    | 2018-01-08      | live poultry market          | others                |
|         | A/Environment/Chongqing/33933/2018 | Chongqing | 2018-09-17      | live poultry market          | surface swab of cages |
|         | A/Environment/Hunan/22552/2019     | Hunan     | 2019-01-08      | live poultry market          | drinking water        |
|         | A/Environment/Sichuan/39514/2019   | Sichuan   | 2019-08-02      | unknown                      | others                |
|         | A/Environment/Jiangxi/13772/2020   | Jiangxi   | 2020-12-08      | unknown                      | others                |

|      |                                         |           |            |                     |        |
|------|-----------------------------------------|-----------|------------|---------------------|--------|
|      | A/Environment/Hunan/00600/2020          | Hunan     | 2020-12-24 | unknown             | others |
|      | A/Environment/Chongqing/19499/2021      | Chongqing | 2021-11-24 | live poultry market | others |
| H4N8 | A/Environment/Guangdong/77233/2014      | Guangdong | 2014-08-18 | live poultry market | others |
|      | A/Environment/Guangxi/28327/2017        | Guangxi   | 2017-05-04 | live poultry market | others |
| H4   | A/Environment/Jiangxi/33289/2015(mixed) | Jiangxi   | 2015-03-24 | live poultry market | others |

\* Unknown, referred to sampling sites without specific information (live poultry market, poultry farm, backyard or processing plants).
