# Supplementary material for: Cross-Species Transmission Potential of H4 Avian Influenza Viruses in China: Epidemiological and Evolutionary Study
Source: MDPI journal article supplement (doi:10.3390/v16030353), 2024-02-24
Supplement: s1 [file s1]

**Table S3.** List of H4 AIVs and genotypes with key molecular markers in China

| Subtype | Genotype | isolate                            | HA                              | PB2                                                         |                                                                         |       | PB1 |      |       | PA    | NP    |      | M2    |      |                                                       |      |        |      |
|---------|----------|------------------------------------|---------------------------------|-------------------------------------------------------------|-------------------------------------------------------------------------|-------|-----|------|-------|-------|-------|------|-------|------|-------------------------------------------------------|------|--------|------|
|         |          |                                    | Altered receptor<br>specificity | Enhanced virus polymerase<br>activity and virulence in mice | Host signature amino acids through statistical methods (avian to human) |       |     |      |       |       |       |      |       |      | Increased resistance to<br>amantadine and rimantadine |      |        |      |
|         |          |                                    |                                 |                                                             | V214I                                                                   | K482R | D9N | M64T | T105M | K702R | R327K | R57Q | S409N | V33I | D455E                                                 | L26F | V27I/A | S31N |
|         |          |                                    |                                 |                                                             |                                                                         |       |     |      |       |       |       |      |       |      |                                                       |      |        |      |
| H4N2    | G3       | A/duck/Guangdong/S1469/2010        | V                               | K                                                           | D                                                                       | M     | T   | K    | R     | R     | S     | V    | D     | L    | I                                                     | S    |        |      |
|         | G4       | A/wild bird/China/Y13/2019         | V                               | K                                                           | D                                                                       | M     | T   | R    | R     | R     | S     | V    | D     | L    | I                                                     | S    |        |      |
|         | G4       | A/duck/Hunan/S11313/2012           | V                               | R                                                           | D                                                                       | M     | T   | K    | R     | R     | S     | V    | D     | L    | V                                                     | S    |        |      |
|         | G9       | A/duck/Jiangsu/1-15/2011           | V                               | K                                                           | D                                                                       | M     | A   | K    | R     | R     | S     | V    | D     | L    | V                                                     | N    |        |      |
|         | G10      | A/duck/Hubei/S2213/2012            | V                               | K                                                           | D                                                                       | M     | T   | K    | R     | R     | S     | V    | D     | L    | I                                                     | S    |        |      |
|         | G14      | A/duck/Hubei/S2227/2012            | V                               | K                                                           | D                                                                       | M     | T   | K    | R     | R     | N     | V    | D     | L    | I                                                     | S    |        |      |
|         | G15      | A/duck/Hunan/01.16 YYGK227-P/2014  | V                               | K                                                           | D                                                                       | M     | T   | K    | K     | R     | S     | V    | D     | L    | V                                                     | S    |        |      |
|         | G16      | A/Environment/Hunan/28094/2014     | V                               | K                                                           | D                                                                       | M     | T   | K    | R     | R     | S     | V    | D     | L    | I                                                     | S    |        |      |
|         | G17      | A/duck/Zhejiang/925170/2014        | V                               | K                                                           | D                                                                       | M     | T   | K    | R     | R     | N     | V    | D     | L    | V                                                     | S    |        |      |
|         | G17      | A/duck/Zhejiang/925161/2014        | V                               | K                                                           | D                                                                       | M     | T   | K    | R     | R     | N     | V    | D     | L    | V                                                     | S    |        |      |
|         | G18      | A/duck/Zhejiang/727145/2014        | V                               | K                                                           | D                                                                       | M     | T   | K    | R     | R     | N     | V    | D     | L    | V                                                     | S    |        |      |
|         | G18      | A/duck/Zhejiang/77140/2014         | V                               | K                                                           | D                                                                       | M     | T   | K    | R     | R     | N     | V    | D     | L    | V                                                     | S    |        |      |
|         | G18      | A/duck/Zhejiang/77127/2014         | V                               | K                                                           | D                                                                       | M     | T   | K    | R     | R     | N     | V    | D     | L    | V                                                     | S    |        |      |
|         | G20      | A/Environment/Guangdong/34254/2019 | V                               | K                                                           | D                                                                       | M     | T   | K    | R     | R     | S     | V    | D     | L    | A                                                     | S    |        |      |
|         | G22      | A/Environment/Guangxi/09909/2021   | V                               | K                                                           | D                                                                       | M     | T   | K    | R     | R     | S     | V    | D     | L    | V                                                     | N    |        |      |
|         | G23      | A/Environment/Guangdong/34255/2019 | V                               | K                                                           | D                                                                       | M     | T   | K    | R     | R     | S     | V    | D     | L    | A                                                     | S    |        |      |
| H4N6    | G2       | A/mallard/Yan chen/2005            | V                               | K                                                           | D                                                                       | M     | T   | R    | R     | R     | S     | V    | D     | L    | V                                                     | S    |        |      |
|         | G3       | A/mallard/ZhaLong/88/2004          | V                               | K                                                           | D                                                                       | I     | A   | K    | R     | R     | S     | V    | D     | L    | V                                                     | S    |        |      |
|         | G4       | A/duck/Shanghai/Y20/2006           | V                               | K                                                           | D                                                                       | M     | M   | K    | R     | R     | S     | V    | D     | L    | V                                                     | S    |        |      |
|         | G5       | A/duck/Hunan/S1012/2009            | V                               | K                                                           | D                                                                       | M     | T   | K    | R     | R     | S     | V    | E     | L    | V                                                     | S    |        |      |
|         | G6       | A/duck/Shanghai/421-2/2009         | I                               | K                                                           | D                                                                       | M     | T   | K    | R     | R     | S     | V    | D     | L    | V                                                     | S    |        |      |
|         | G7       | A/Environment/Hubei/02/2009        | V                               | K                                                           | D                                                                       | M     | T   | K    | K     | R     | S     | V    | D     | L    | V                                                     | S    |        |      |
|         | G7       | A/duck/Yunnan/YN-1/2011            | V                               | K                                                           | D                                                                       | M     | T   | K    | R     | Q     | S     | V    | D     | L    | V                                                     | S    |        |      |
|         | G7       | A/Environment/Hunan/00600/2020     | V                               | K                                                           | D                                                                       | M     | T   | R    | R     | R     | S     | V    | D     | L    | V                                                     | S    |        |      |
|         | G8       | A/weiyangshui/Jiangxi/14/2009      | V                               | K                                                           | D                                                                       | M     | T   | K    | R     | R     | S     | V    | D     | L    | I                                                     | S    |        |      |
|         | G8       | A/duck/Guangxi/S2090/2012          | V                               | K                                                           | D                                                                       | M     | M   | K    | R     | R     | S     | V    | D     | L    | V                                                     | S    |        |      |
|         | G8       | A/duck/Anhui/S4155/2009            | V                               | K                                                           | D                                                                       | M     | T   | K    | R     | R     | S     | I    | D     | L    | V                                                     | S    |        |      |

|             |     |                                       |   |   |   |   |   |   |   |   |   |   |   |   |   |   |
|-------------|-----|---------------------------------------|---|---|---|---|---|---|---|---|---|---|---|---|---|---|
|             | G8  | A/duck/Anhui/S2193/2012               | V | K | D | M | T | K | R | R | S | V | D | L | V | N |
|             | G8  | A/duck/Guangxi/149D24/2013            | V | K | D | M | T | K | K | R | S | V | D | L | V | S |
|             | G9  | A/duck/Shanghai/67-2/2009             | V | K | D | M | T | K | R | R | S | V | D | L | I | S |
|             | G9  | A/duck/Shanghai/46-2/2009             | V | K | D | M | T | K | R | R | S | V | D | L | I | S |
|             | G9  | A/duck/Shanghai/44-2/2009             | V | K | D | M | T | K | R | R | S | V | D | L | I | S |
|             | G15 | A/duck/Zhejiang/D2-1/2013             | V | K | D | M | A | K | R | R | S | V | D | L | V | S |
|             | G23 | A/Environment/Chongqing/33933/2018    | V | K | D | M | T | K | R | Q | S | V | D | L | V | S |
|             | G24 | A/Environment/Sichuan/39514/2019      | V | K | D | T | T | K | R | R | S | V | D | L | V | S |
| <b>H4N8</b> | G1  | A/chicken/Guangdong/S1010/2010        | V | K | D | M | T | K | R | R | S | V | D | F | I | S |
|             | G3  | A/Mallard/Hubei/chenhu VII09/2015     | V | K | D | M | T | K | R | R | S | I | D | L | V | S |
|             | G3  | A/goose/Hunan/S2466/2011              | V | K | N | M | T | K | R | R | S | V | D | L | V | S |
|             | G5  | A/greylag goose/Changsha/CS-1983/2013 | V | K | D | M | T | K | R | R | S | V | D | L | I | S |
|             | G6  | A/greylag goose/Changsha/CS-510/2013  | V | K | D | M | T | K | R | R | S | V | D | L | I | S |
|             | G9  | A/chicken/Jiangsu/YC/2015             | V | K | D | M | T | K | R | R | S | V | D | L | A | S |
