# Supplementary material for: Cross-Species Transmission Potential of H4 Avian Influenza Viruses in China: Epidemiological and Evolutionary Study
Source: MDPI journal article supplement (doi:10.3390/v16030353), 2024-02-24
Supplement: s1 [file s1]

**(b)PB1**

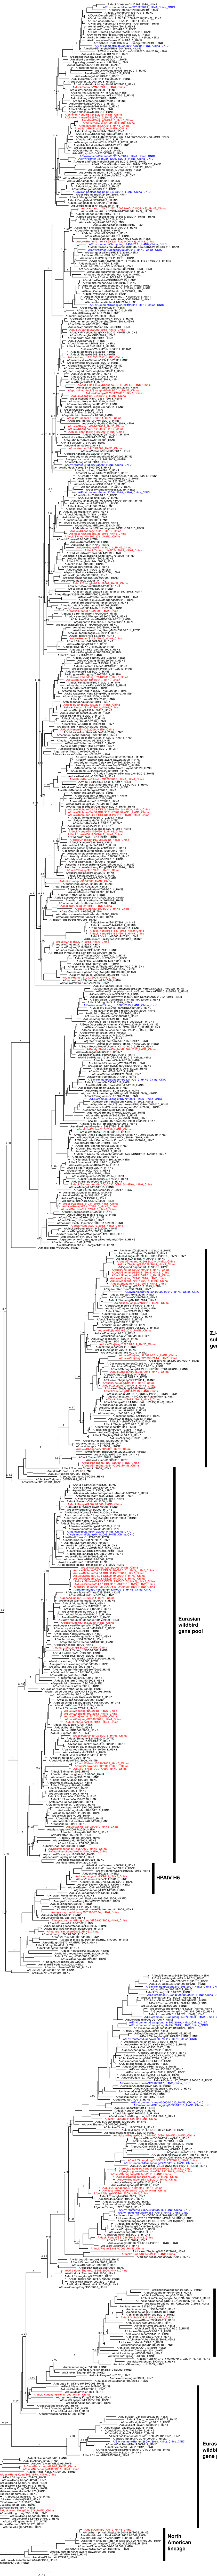

1

### 5 polineage ne pool

1

7\_H5N6



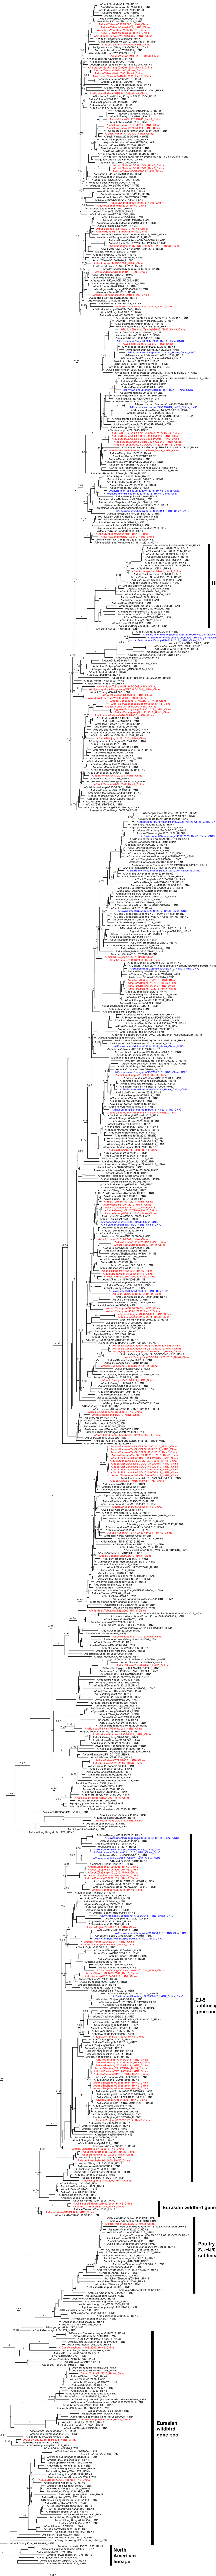



(d)NP

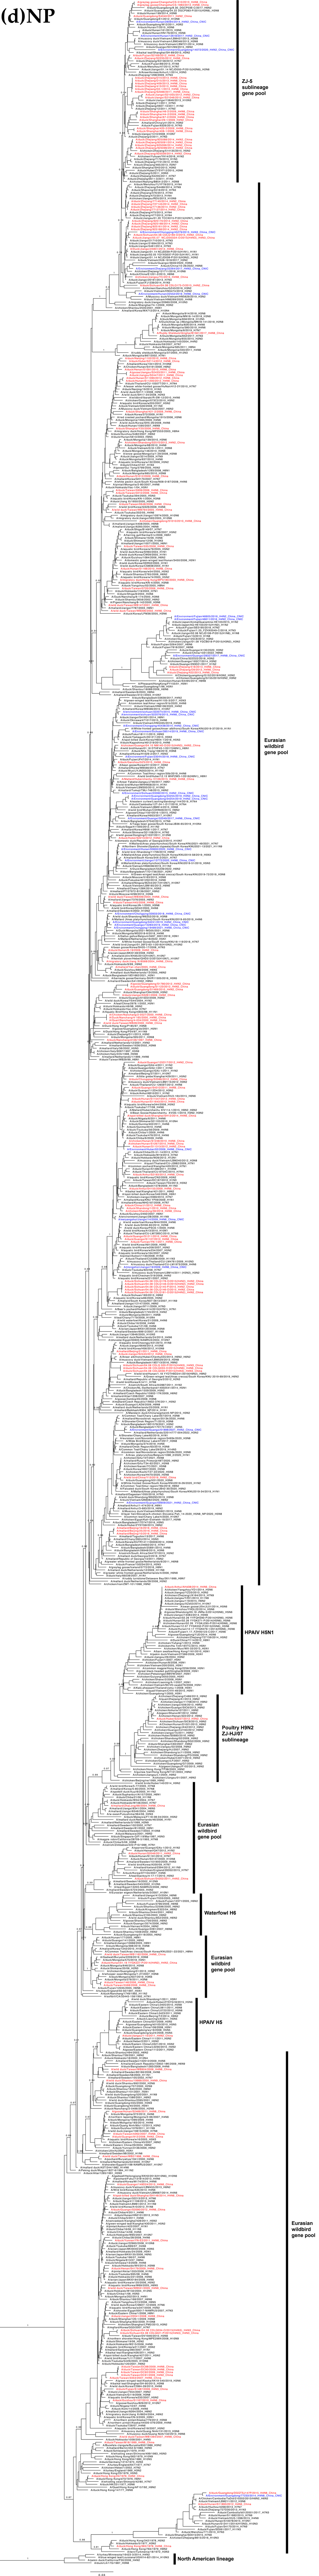



**(e) M**

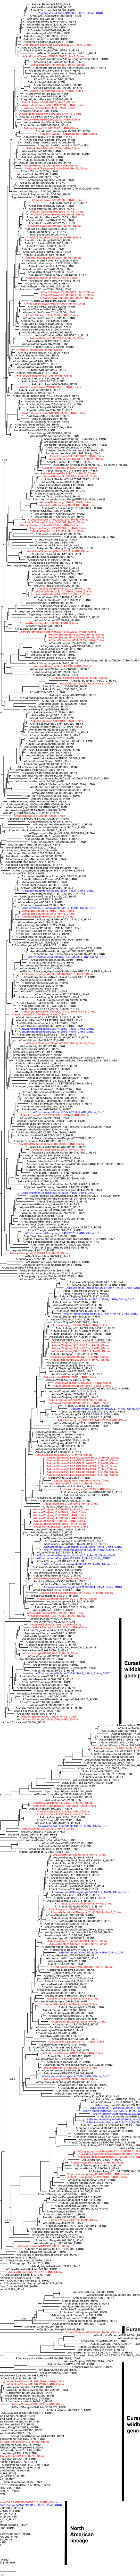

Eurasian  
wildbird  
gene poo

1



sublineage  
gene pool

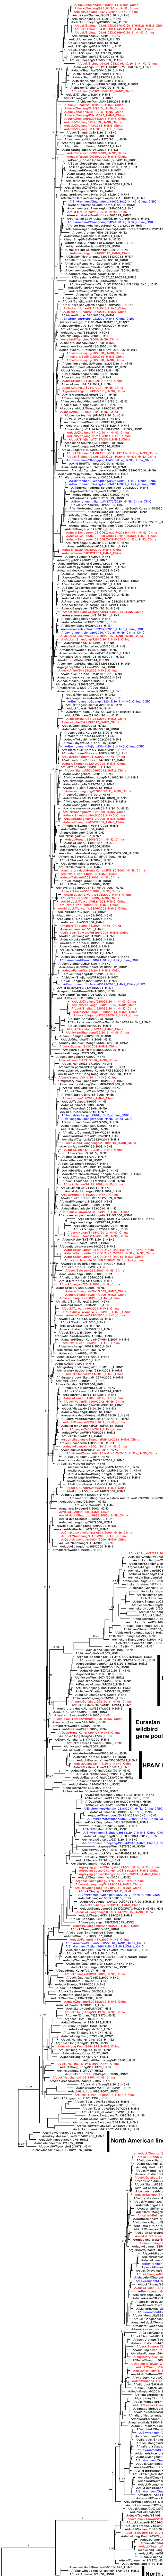

2\_China  
\_China  
\_China

A/duck/Jiangsu  
A/velvet scot  
A/common te  
**A/duck/Sichu**  
A/ruddy shield  
A/duck/Mongc

ea/KNU2019-35/2019\_H1N1  
B\_China\_CNIC

52870/2006\_H  
1993\_H5N2  
402-6/1986\_H5  
andong/11708/2  
nt/Chongqing/1  
Shanghai/JDS1

= A/Gadwall/O  
 k/Potsdam/221  
 icken/Taiwan/G  
 luck/Japan/9UC  
 /duck/Hokkaido  
 ck/Tsukuba/12



**Figure S3.** Maximum likelihood trees of internal-protein coding genes. (a) PB2 gene (n=937); (b) PB1 gene (n=929); (c) PA gene (n=890); (d) NP gene (n=914); (e) M gene (n=890); (f) NS gene (n=749). H4 strains sequenced in this study are in steel blue. Other H4 AIVs in China are in red. Branch lengths are scaled according to the number of substitutions per site. Branch support values of selected nodes are shown. Lineages, sublineages and subgroups are labeled with vertical lines on the right.
