# Supplementary material for: Cross-Species Transmission Potential of H4 Avian Influenza Viruses in China: Epidemiological and Evolutionary Study
Source: MDPI journal article supplement (doi:10.3390/v16030353), 2024-02-24
Supplement: s1 [file s1]

(a)N2

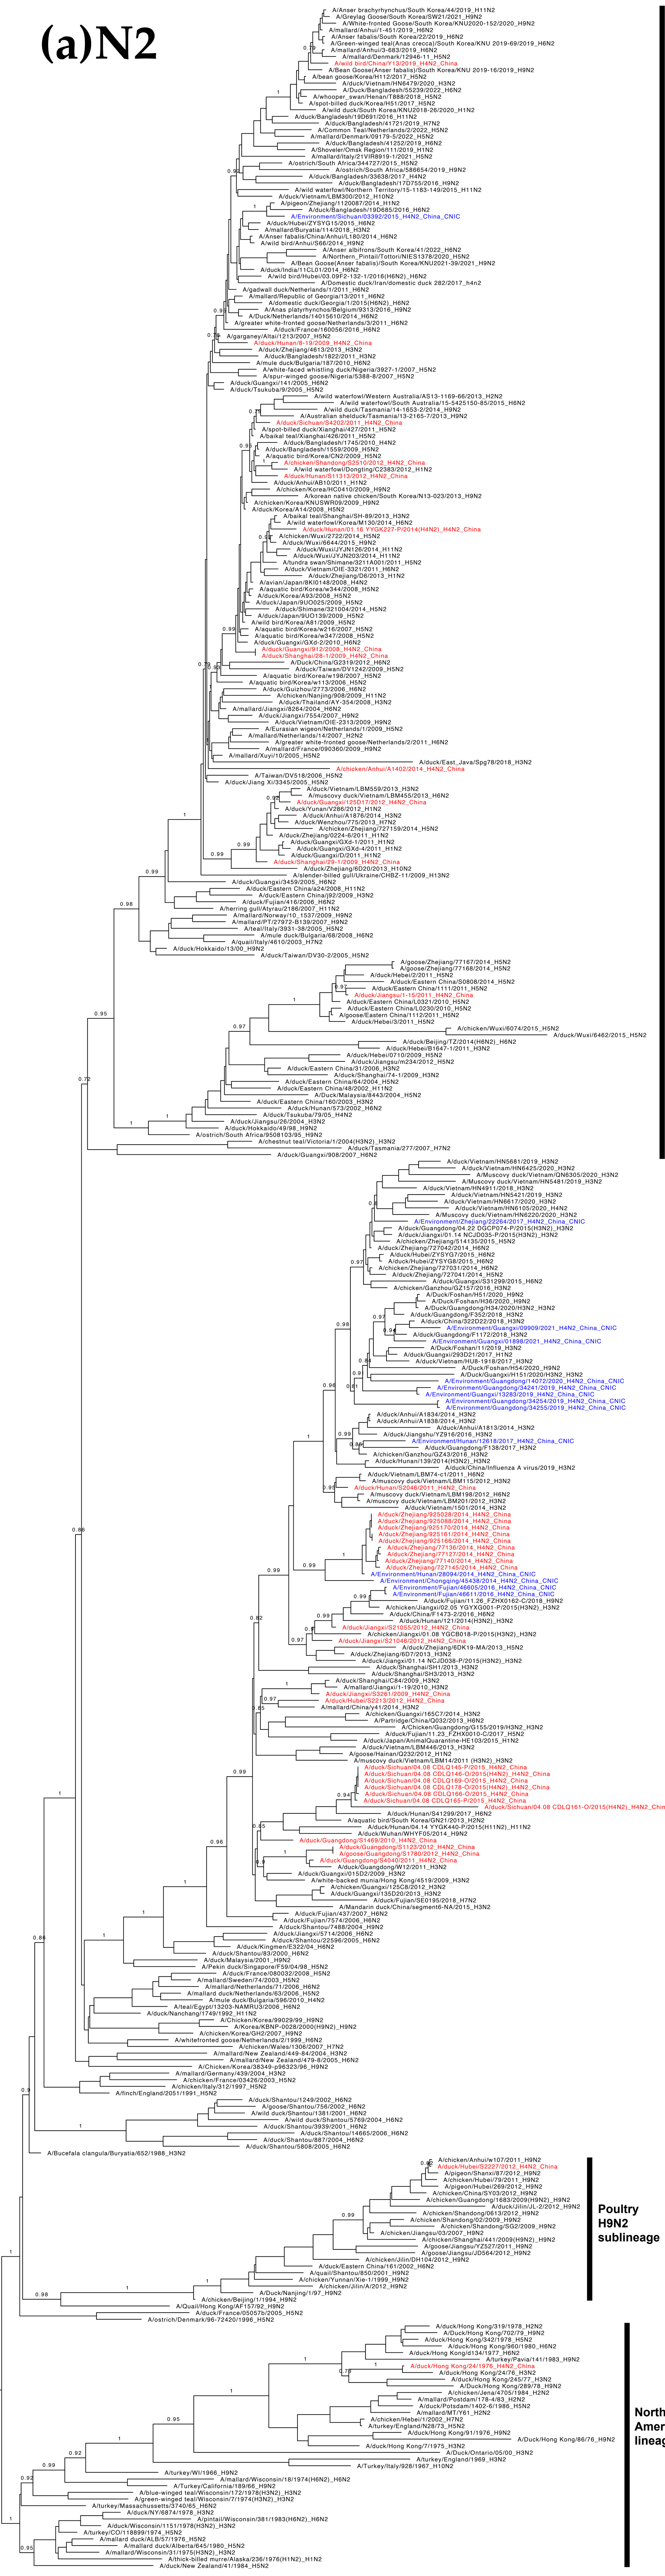

Eurasian-1  
sublineage

Eurasian  
lineage

Eurasian-2  
sublineage

Poultry  
H9N2  
sublineage

North  
American  
lineage



(b)N3

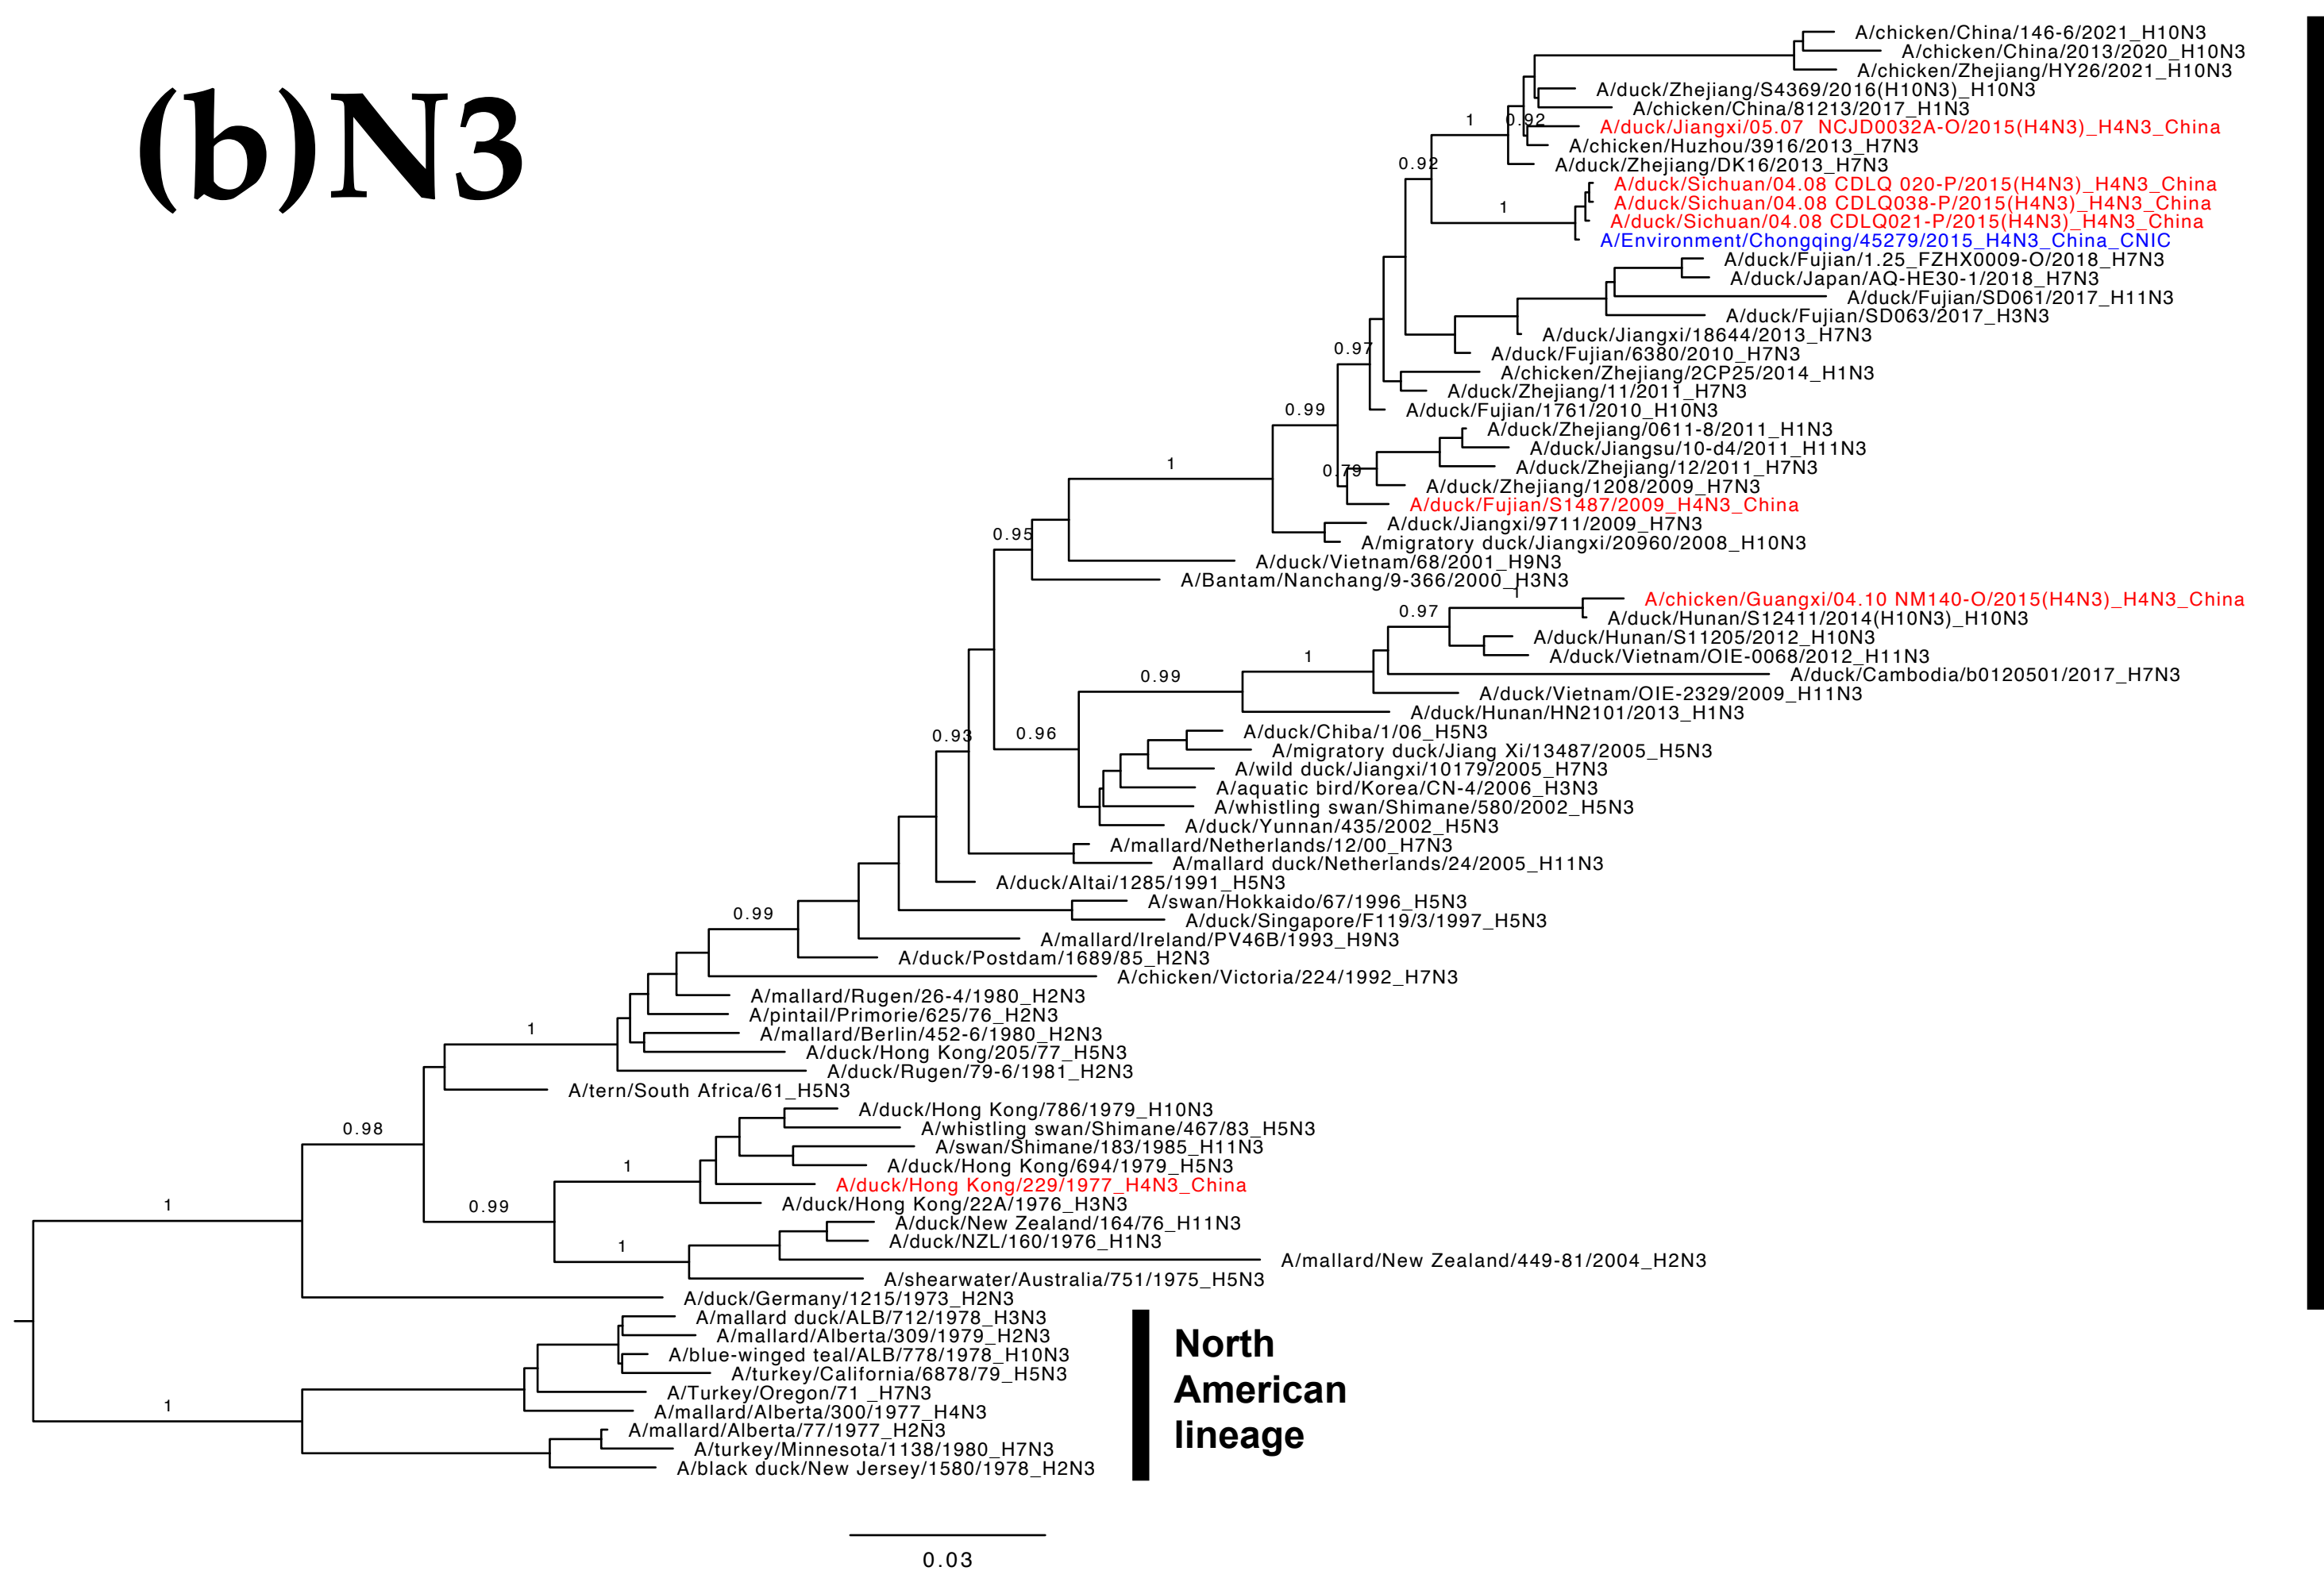



(c)N6

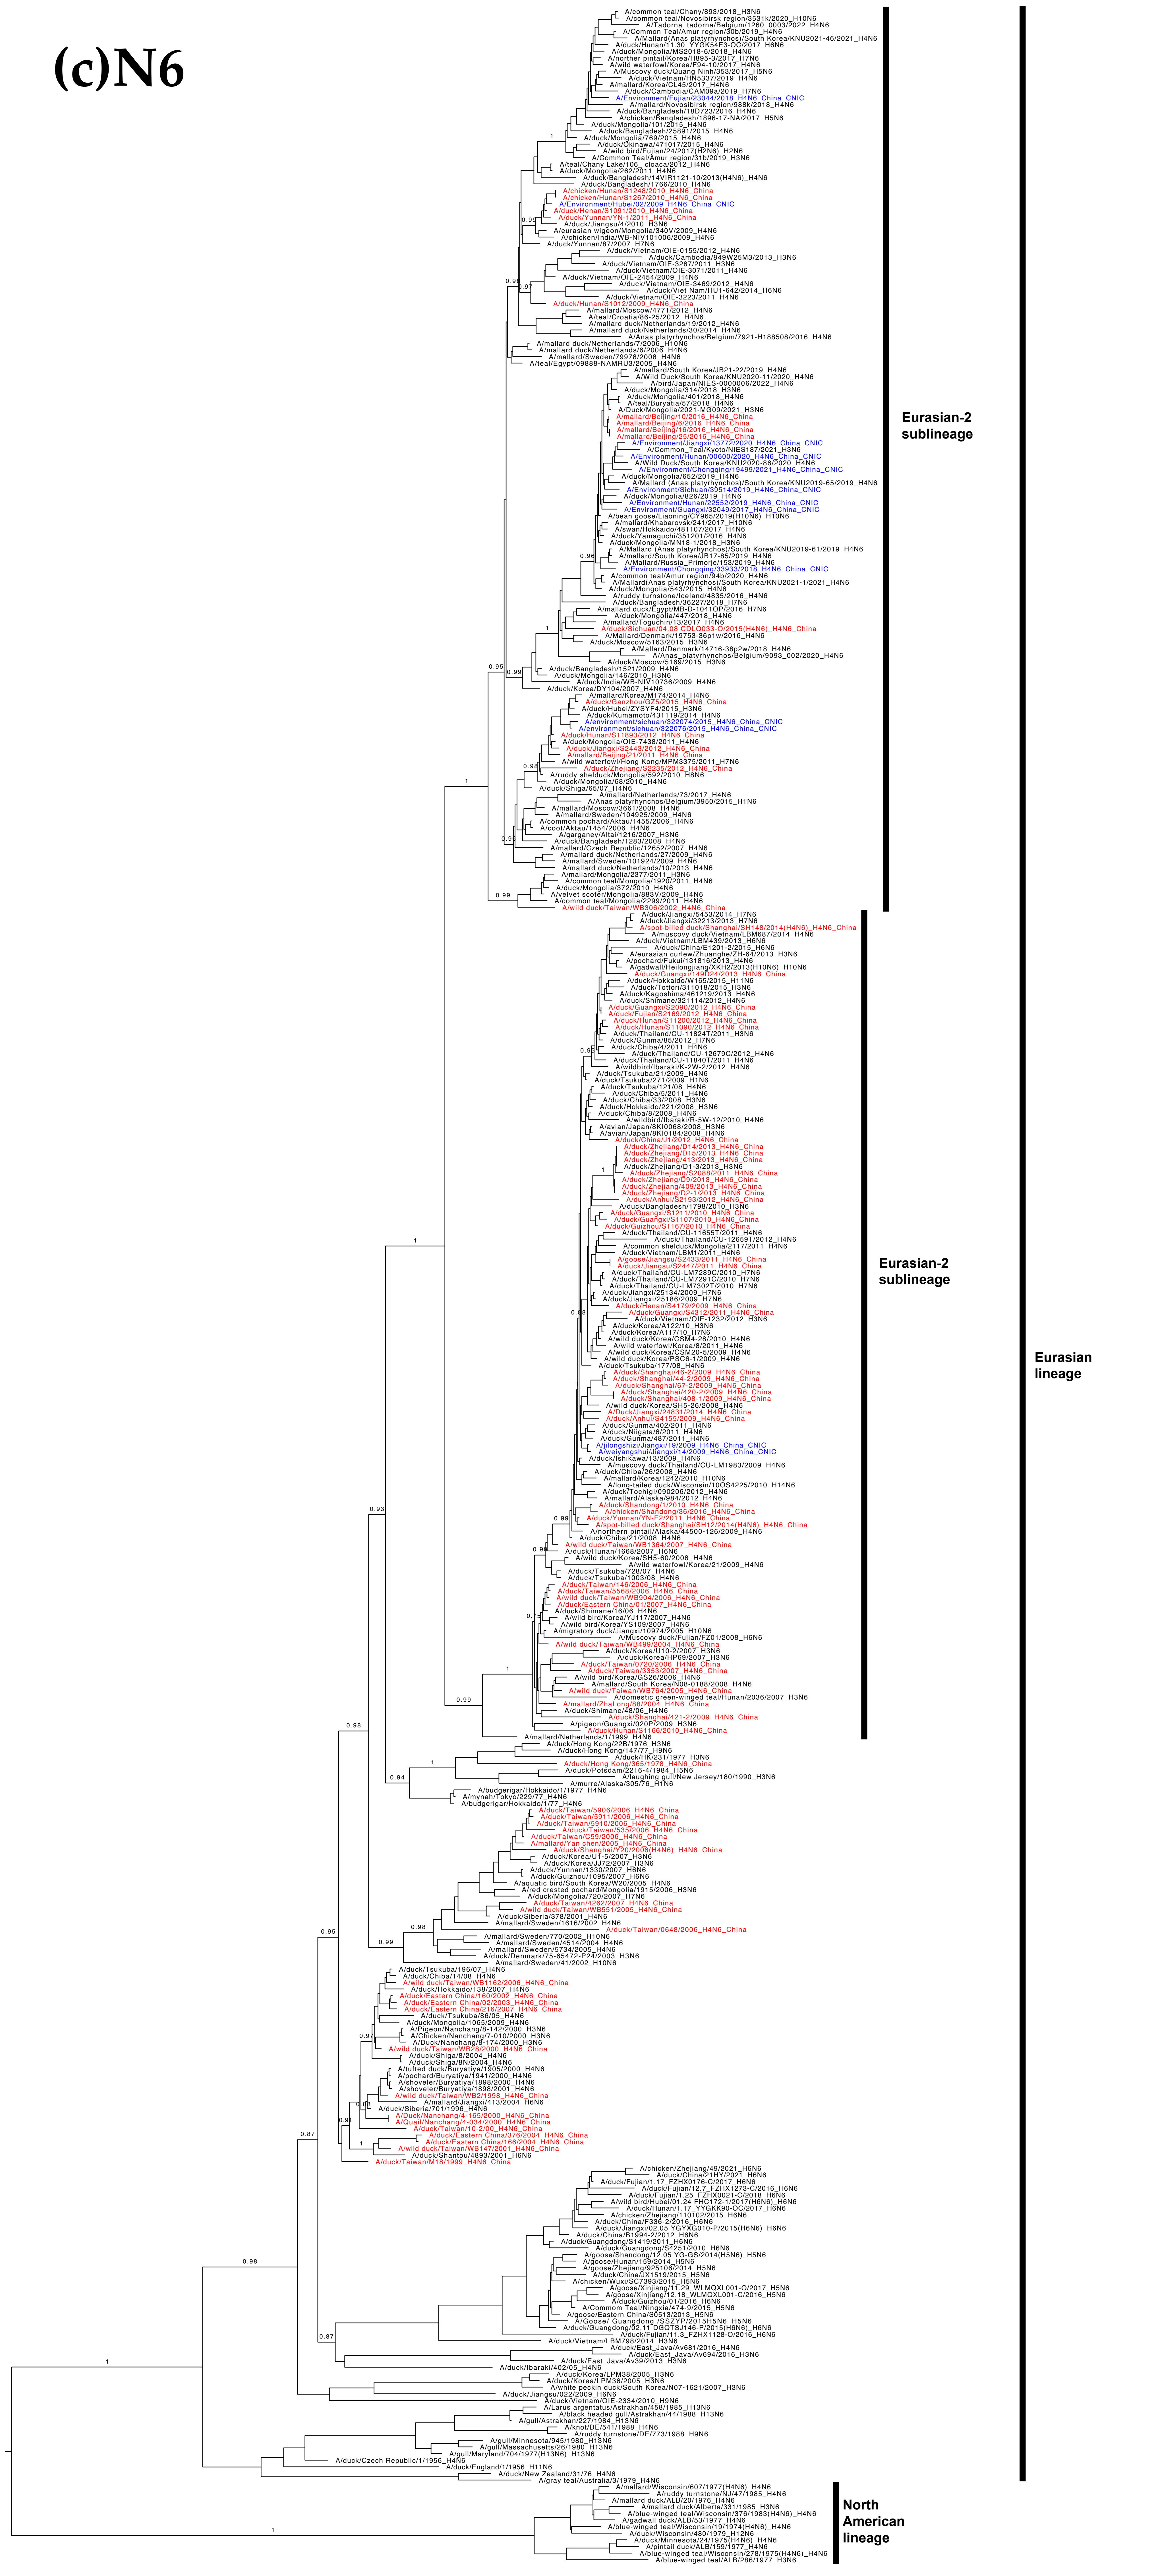



(d)N8

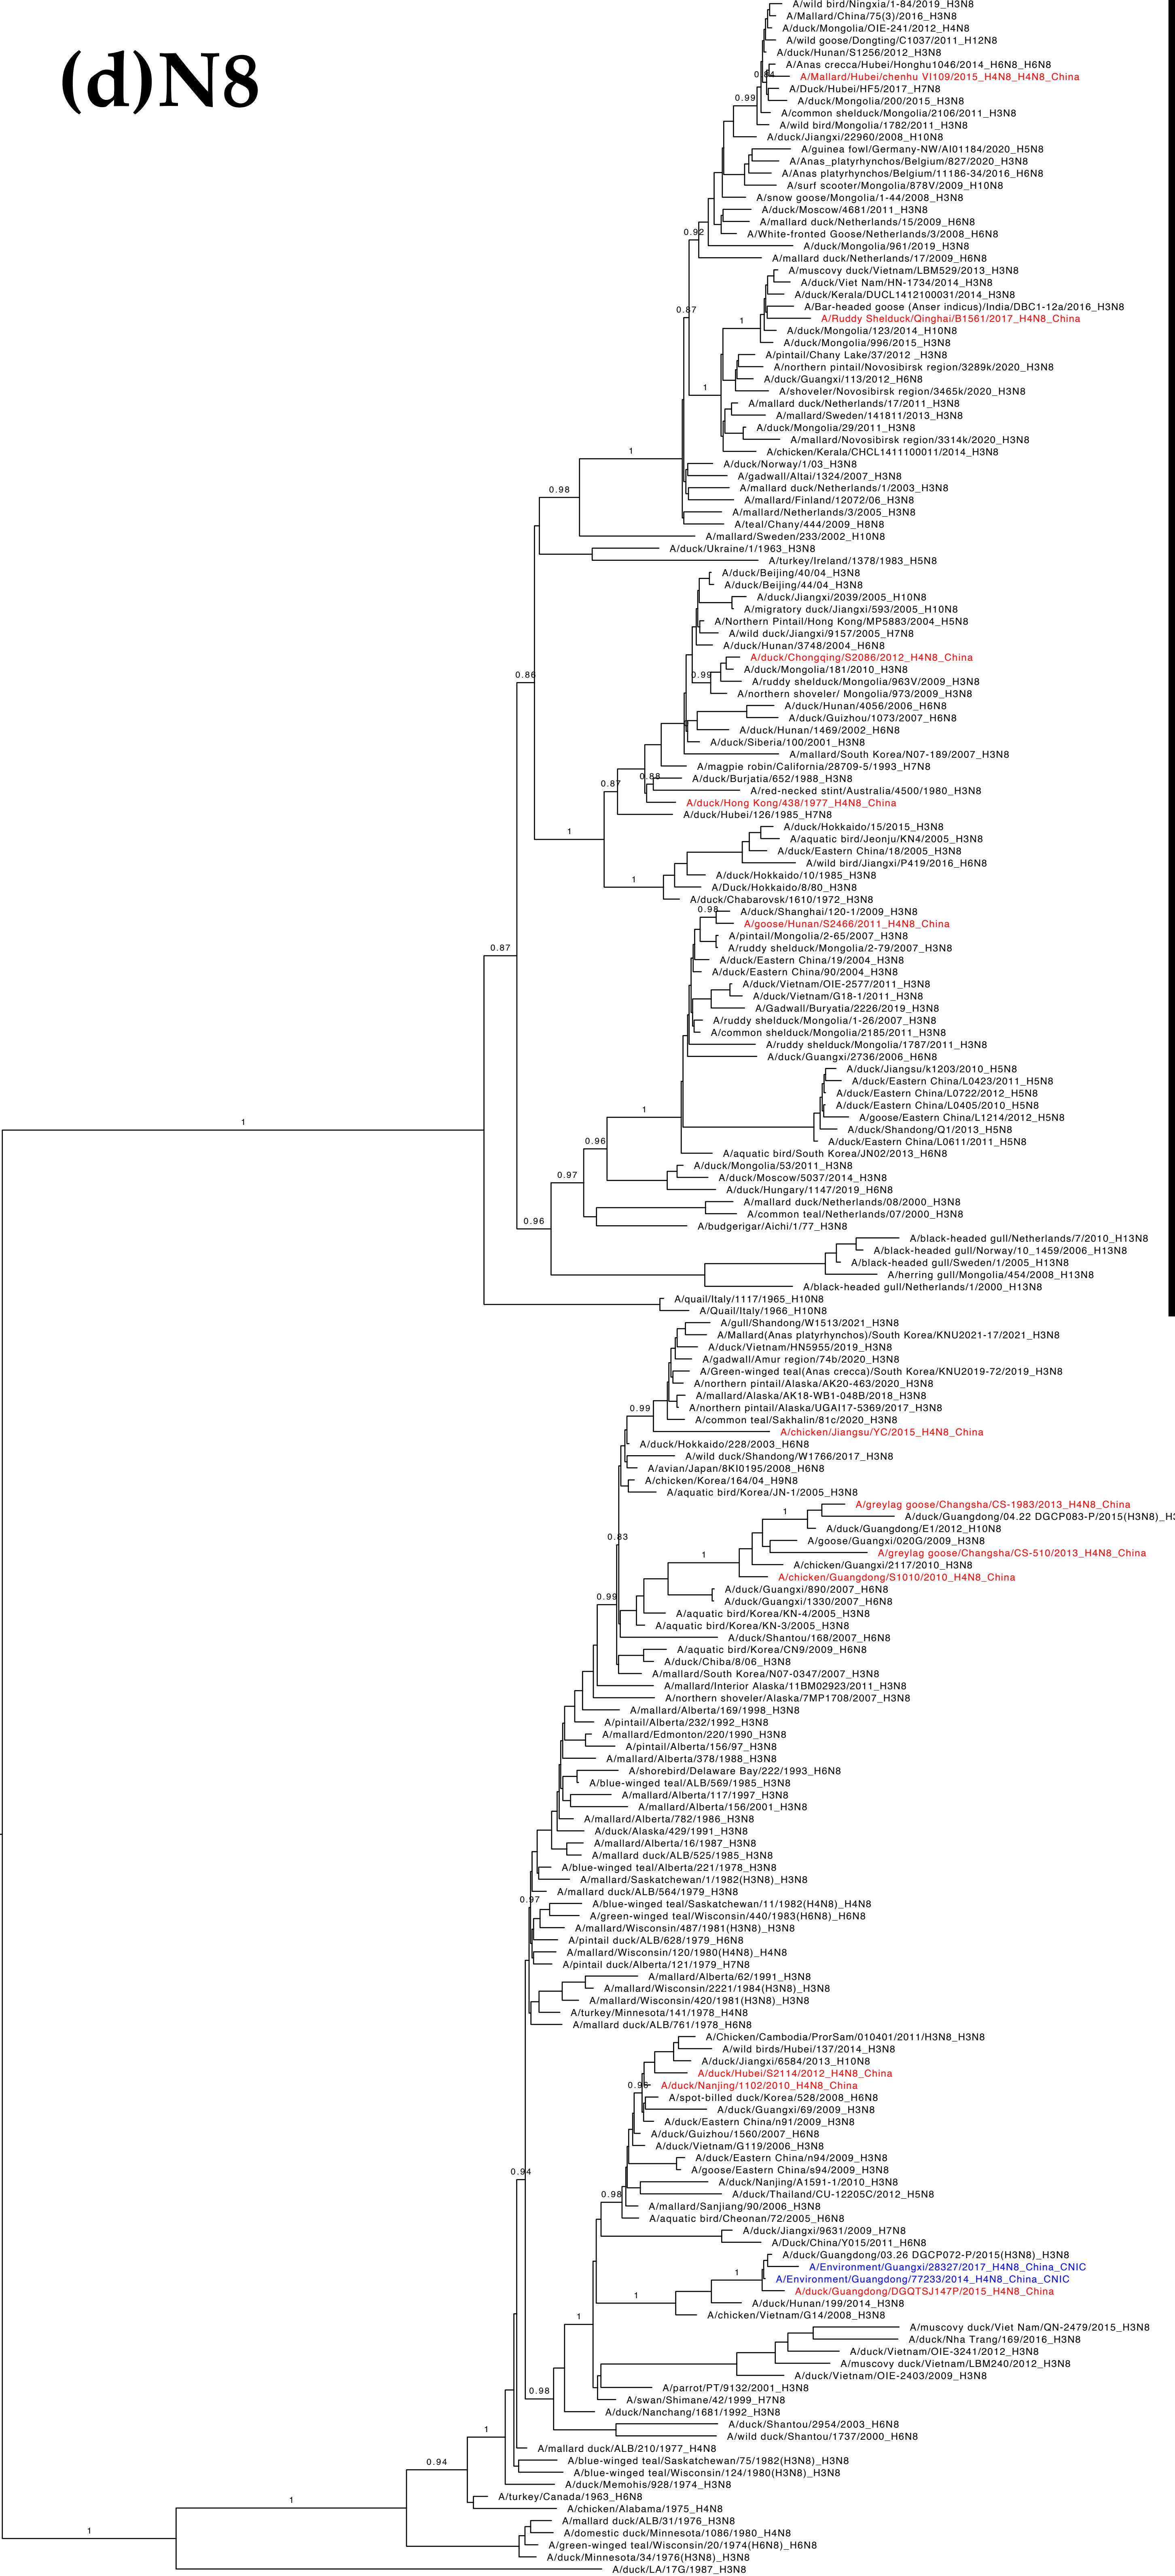

Eurasian lineage

North American lineage

**Figure S2.** Phylogenetic tree of neuraminidase (NA) genes. (a) N2 gene (n=385); (b) N3 gene (n=77); (c) N6 gene (n=386); (d) N8 gene (n=213). H4 strains sequenced in this study are in steel blue. Other H4 AIVs in China are in red. Branch lengths are scaled according to the number of substitutions per site. Branch support values of selected nodes are shown. Lineages, sublineages and subgroups are labeled with vertical lines on the right.
